# Supplementary material
Source: PubMed Central journal article supplement (PMC8280490)

A

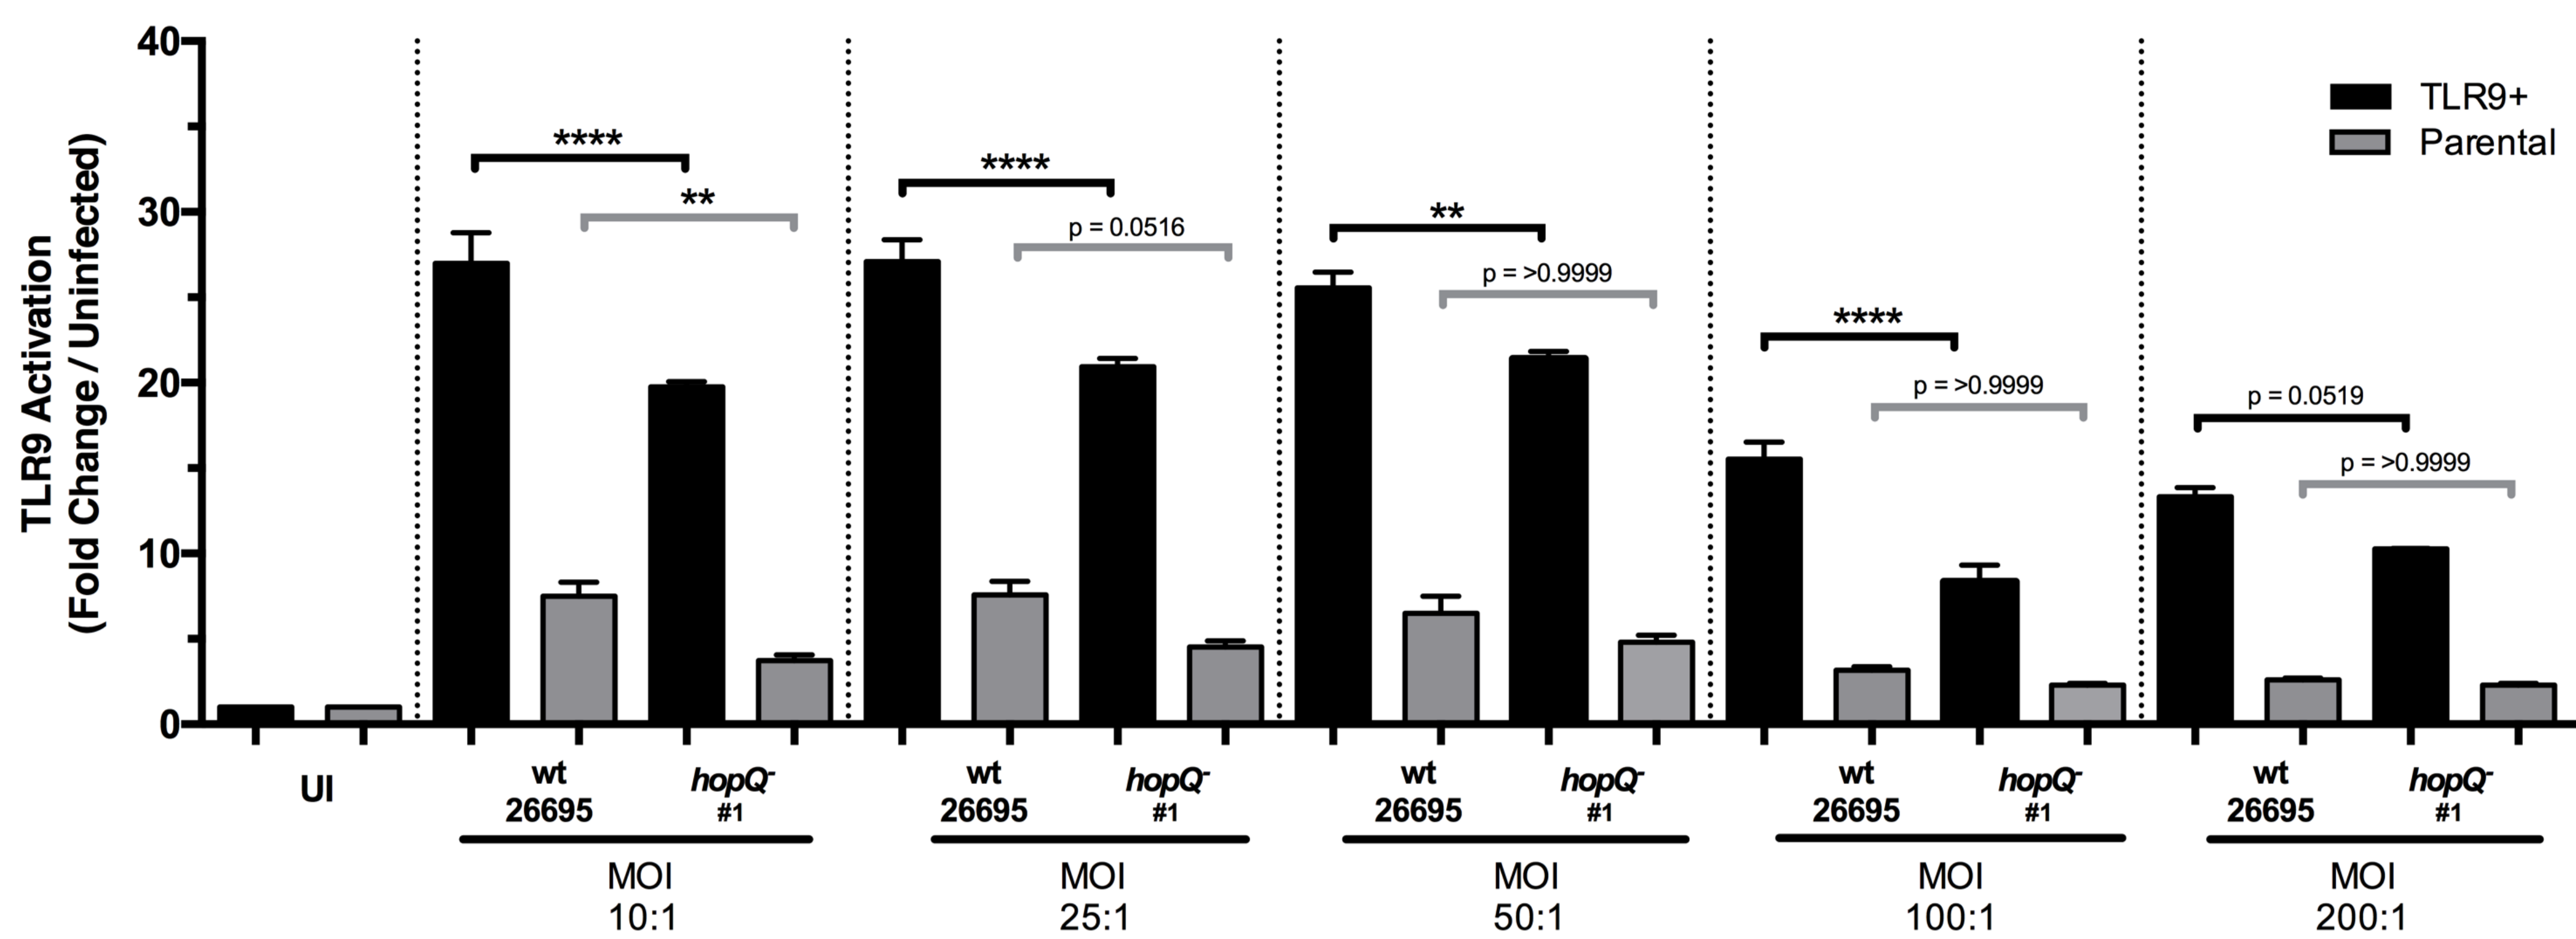

B

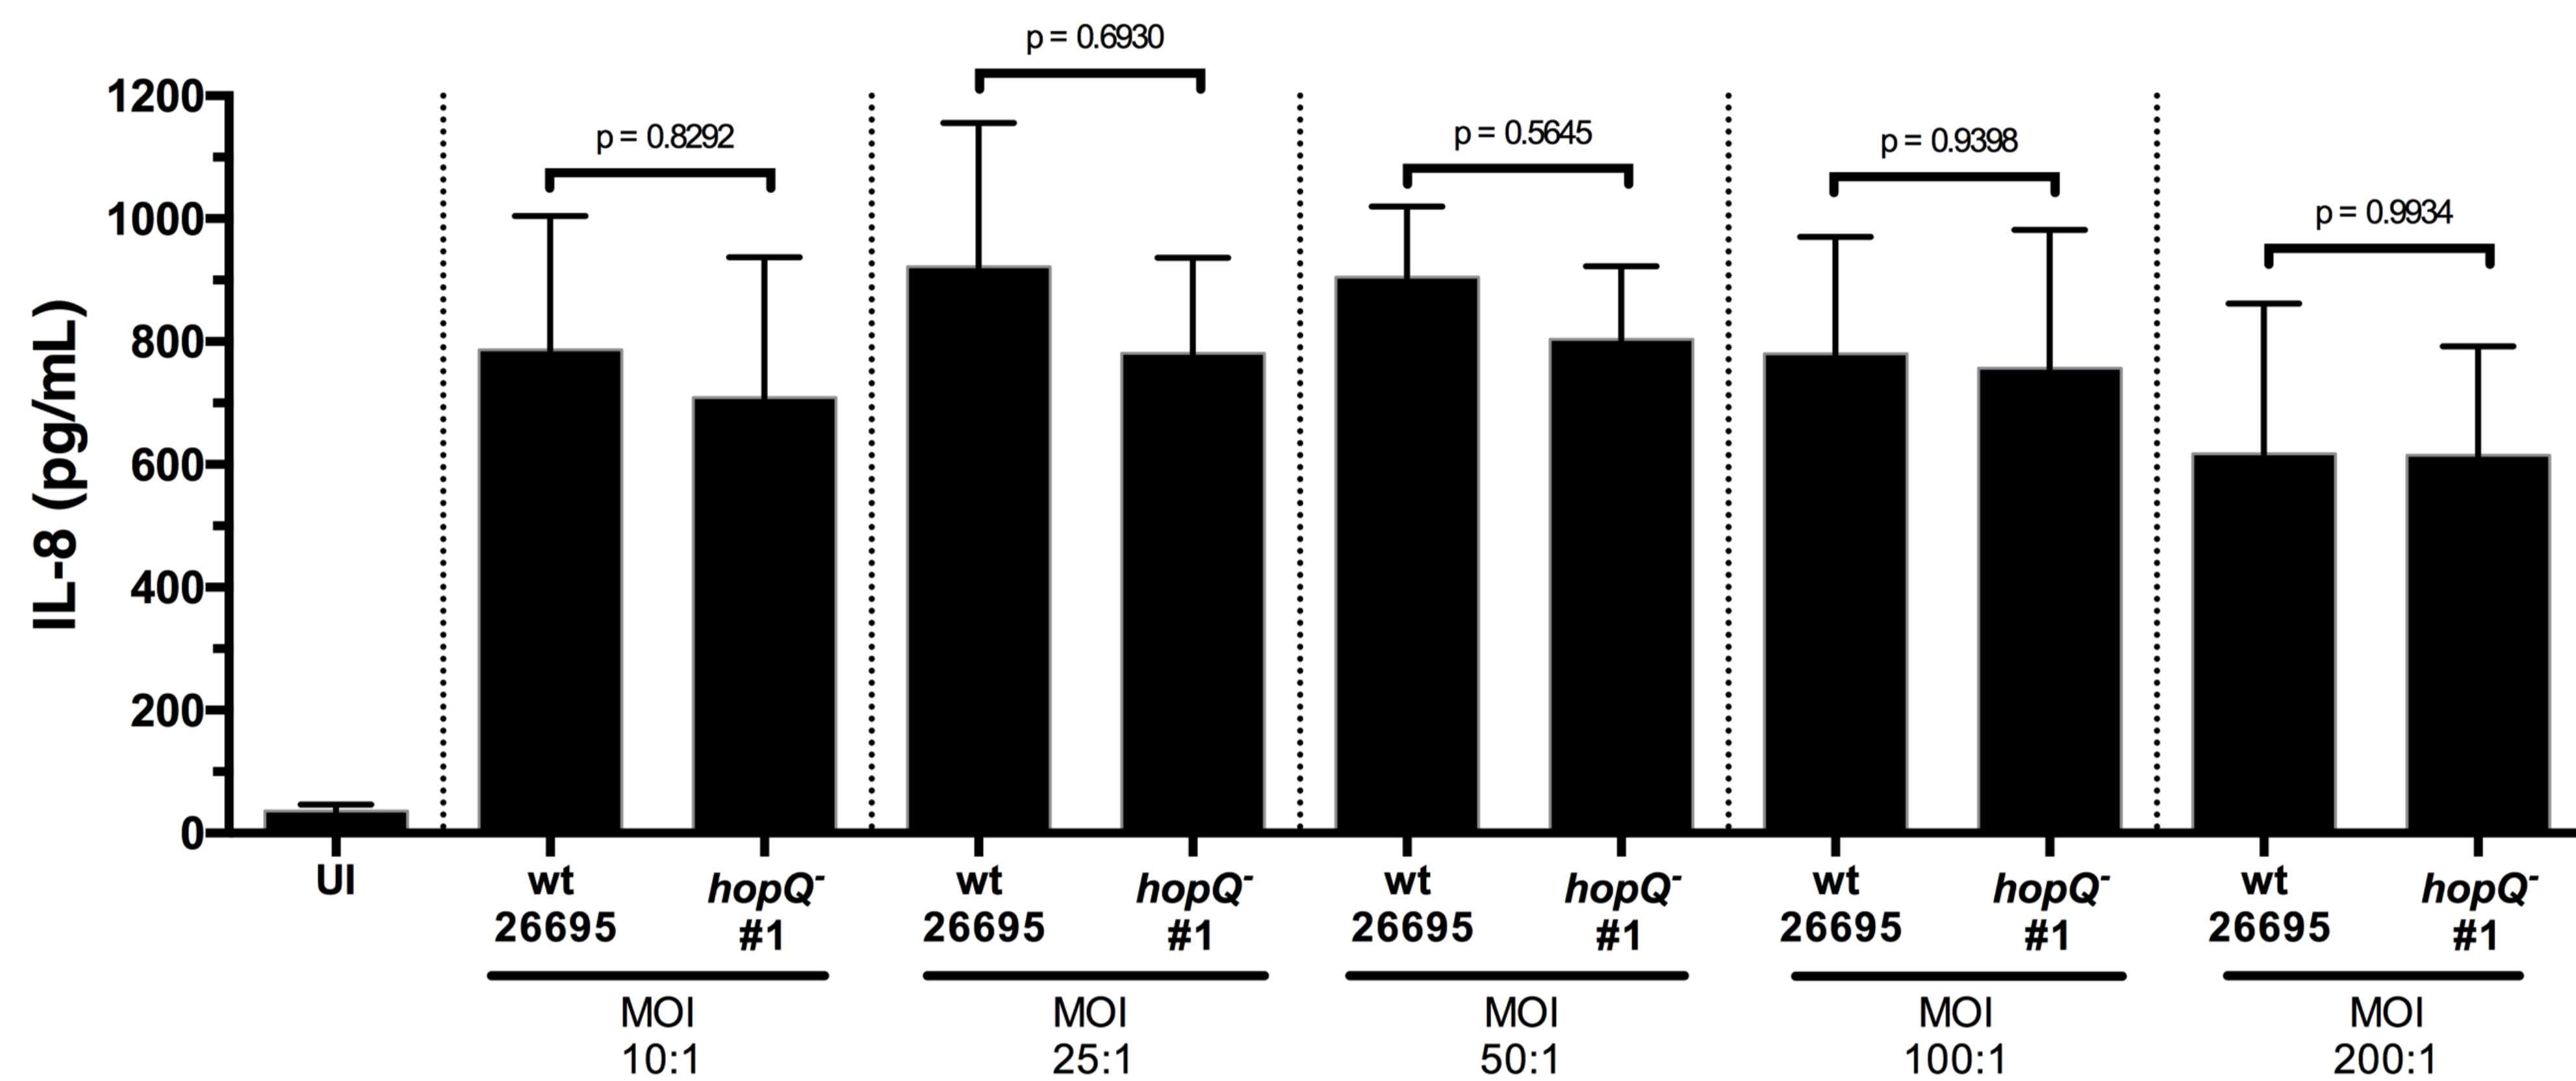

C

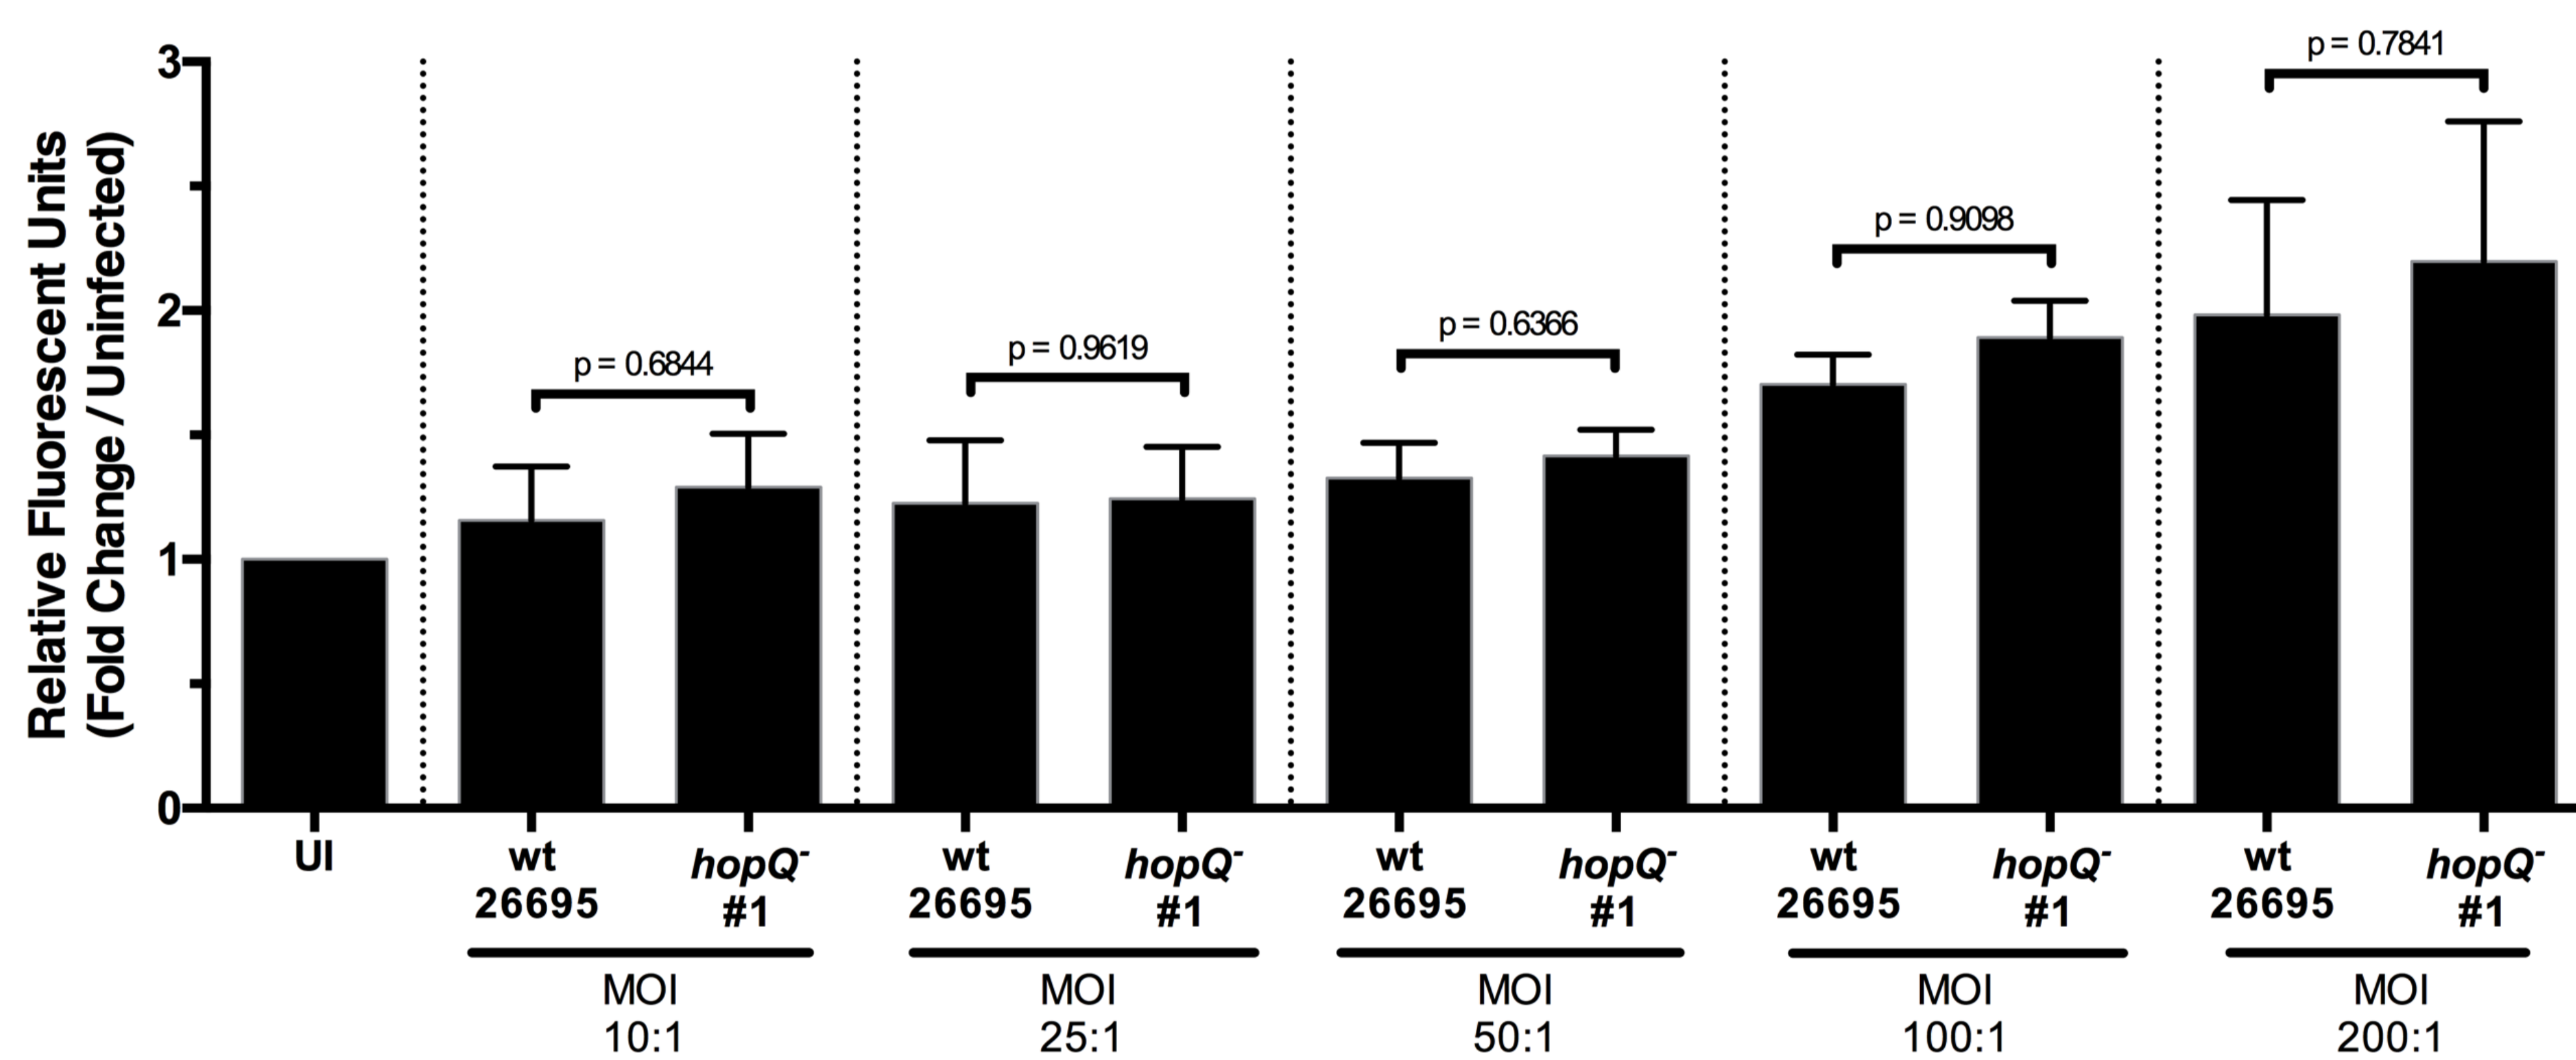

D

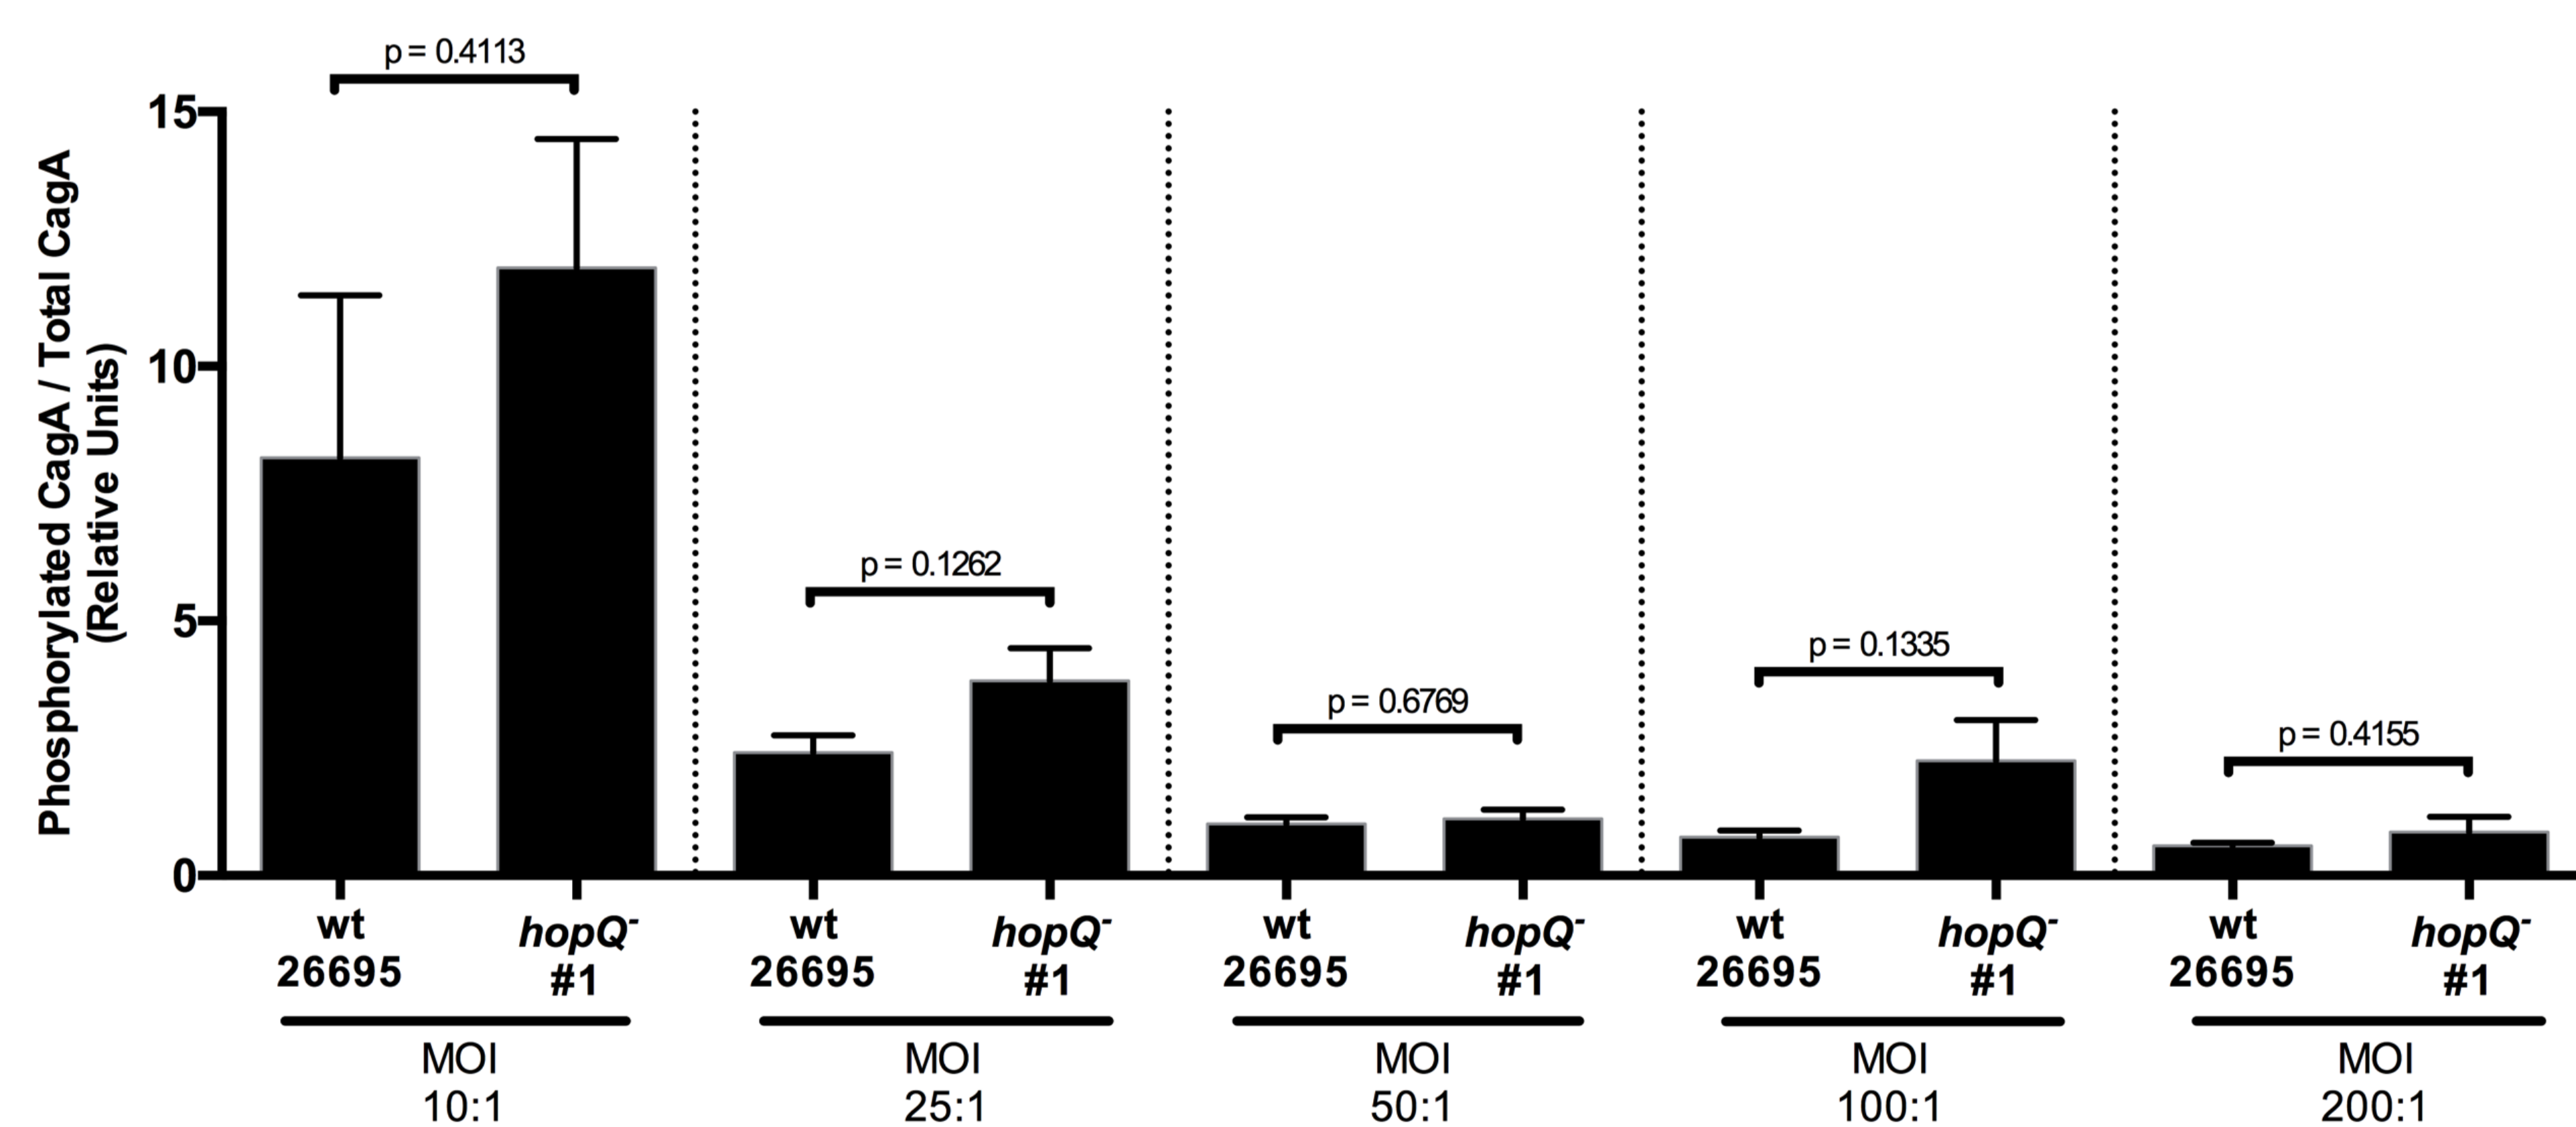

E

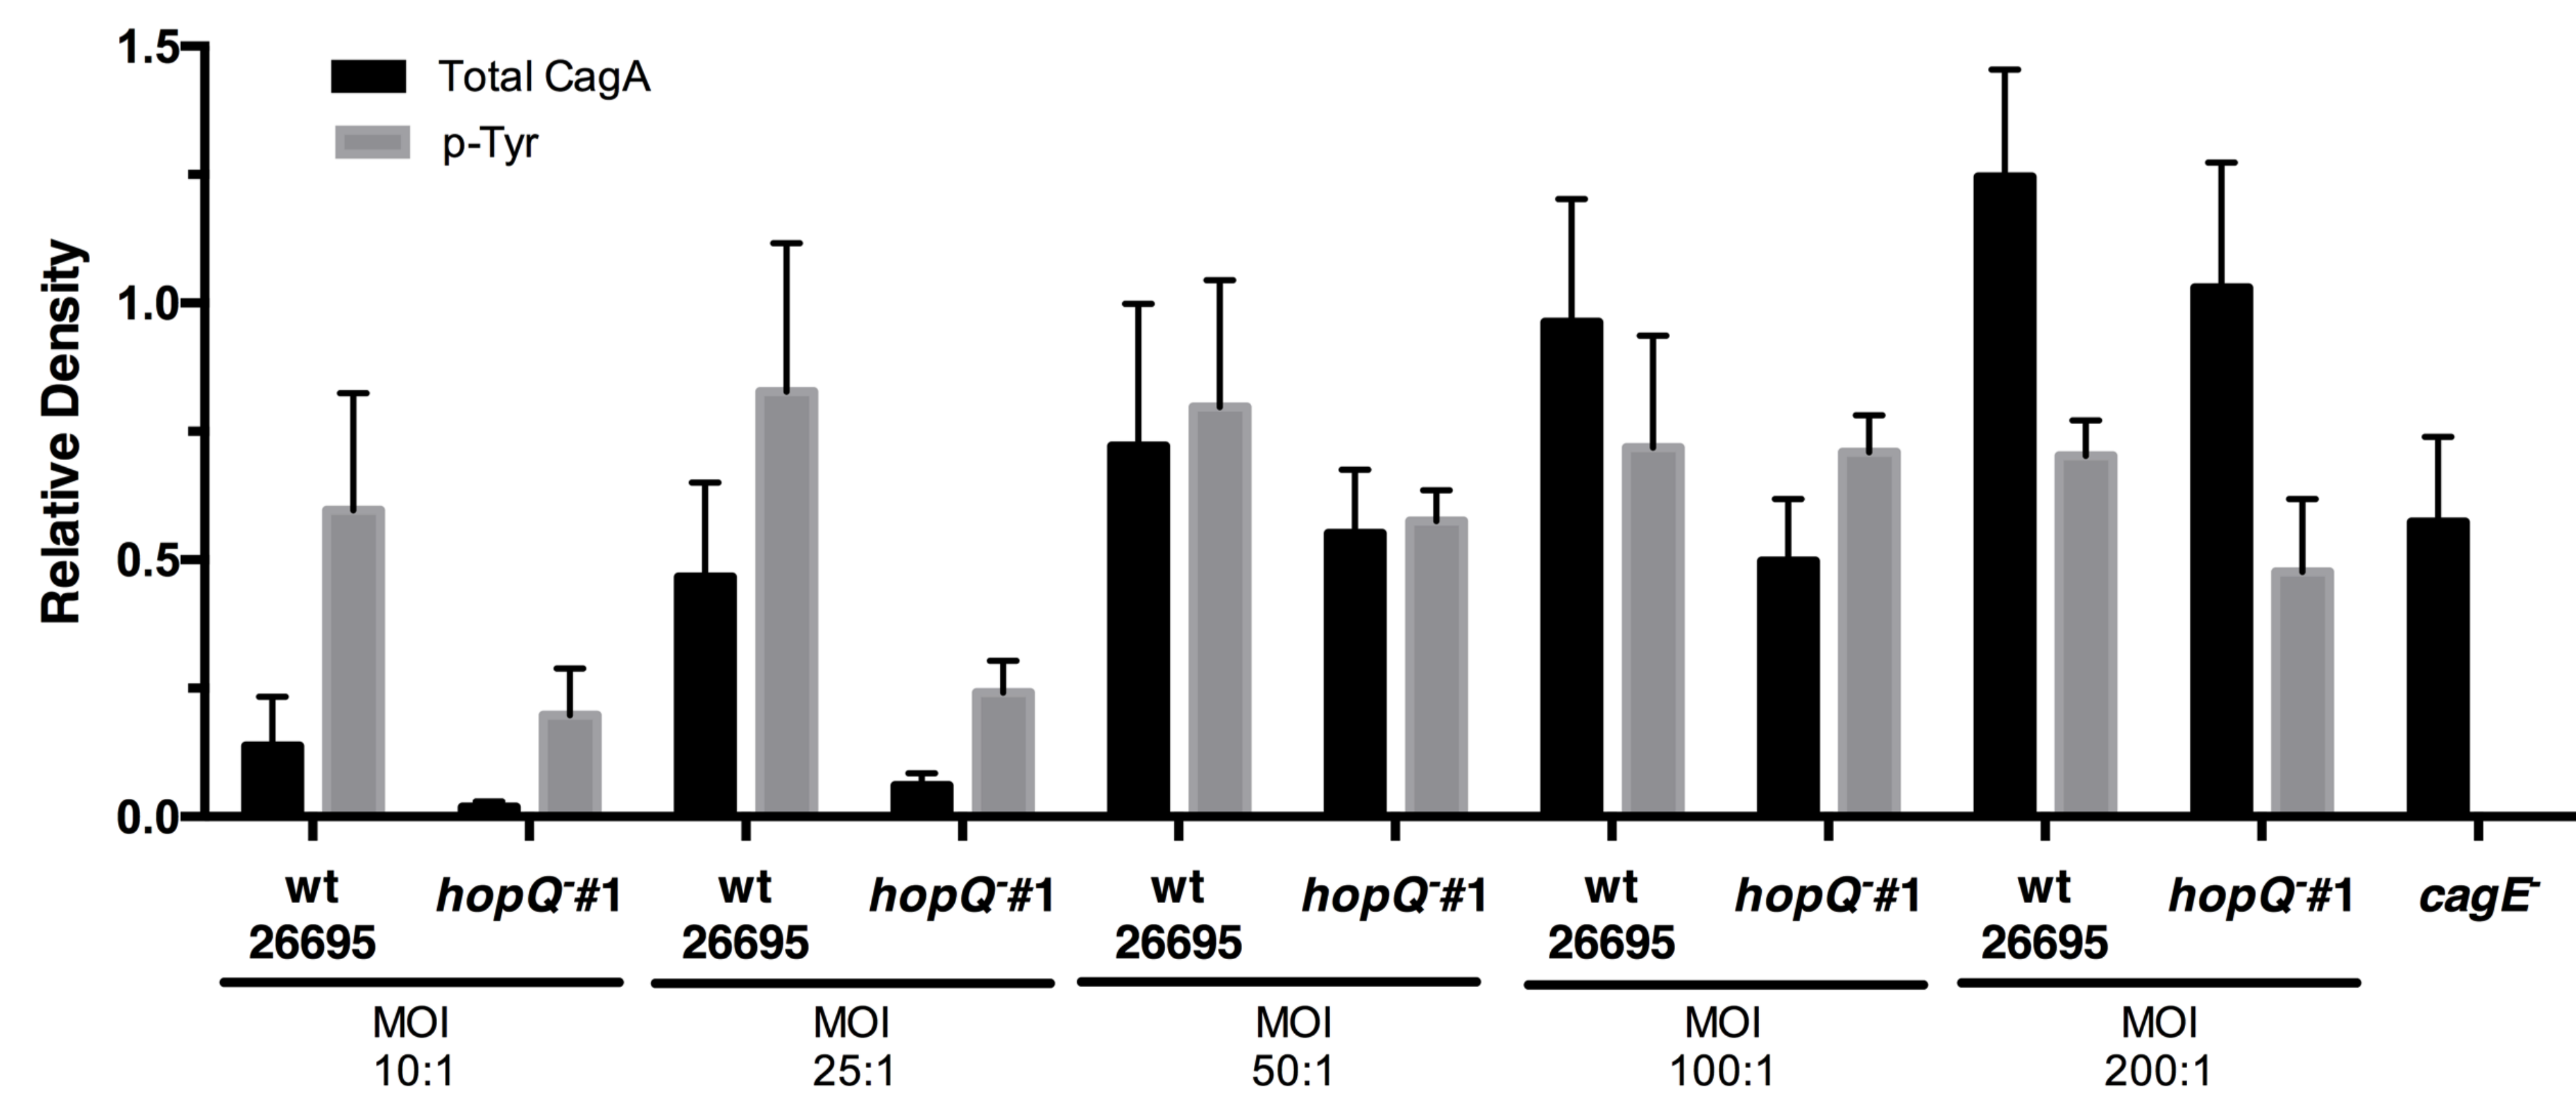

Supplement: jiaa730_suppl_supplementary_figure_1.pdf [file jiaa730_suppl_supplementary_figure_1.pdf]

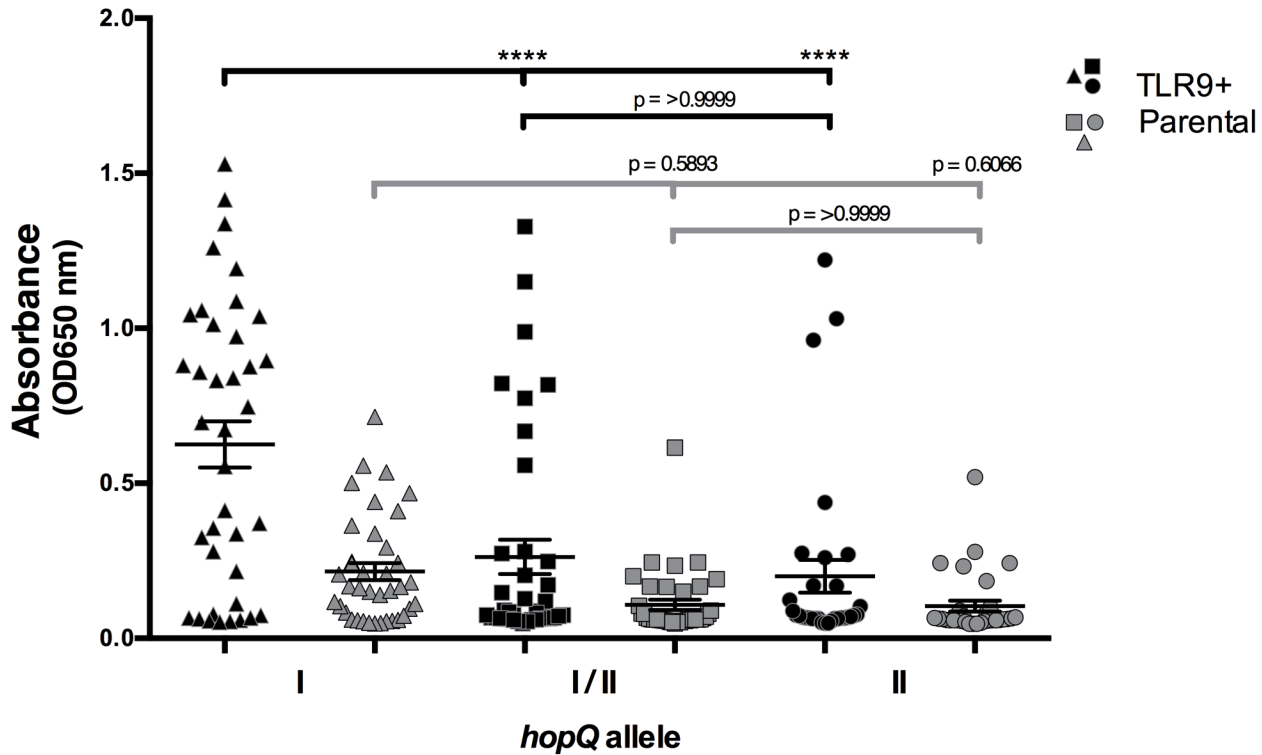

Supplement: jiaa730_suppl_supplementary_figure_2.pdf [file jiaa730_suppl_supplementary_figure_2.pdf]

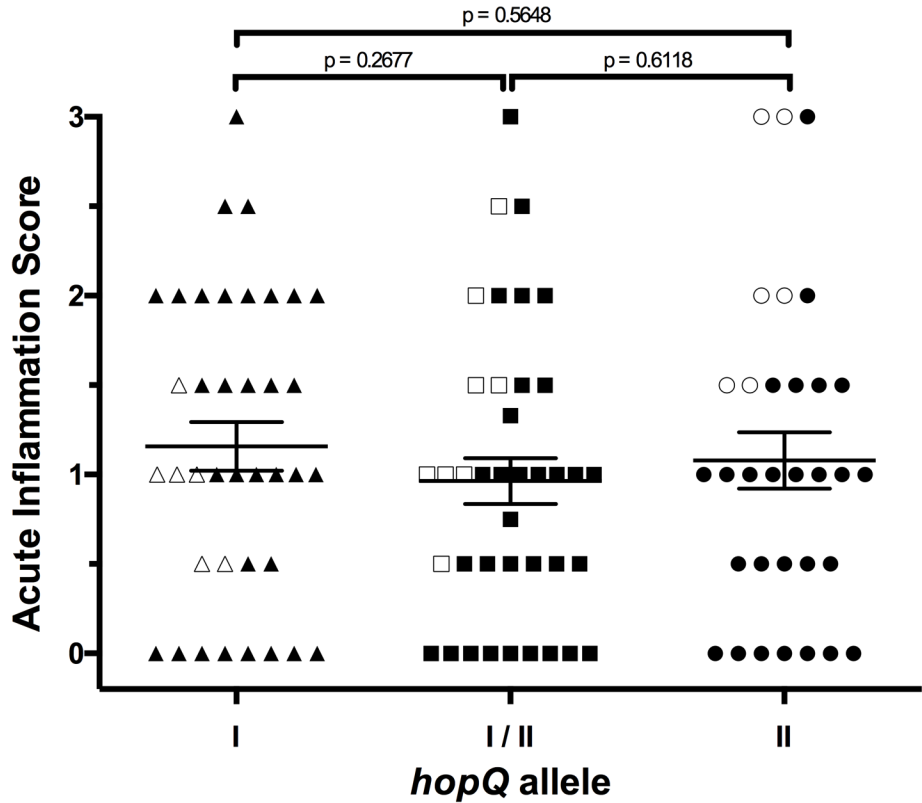

Supplement: jiaa730_suppl_supplementary_figure_3.pdf [file jiaa730_suppl_supplementary_figure_3.pdf]

A

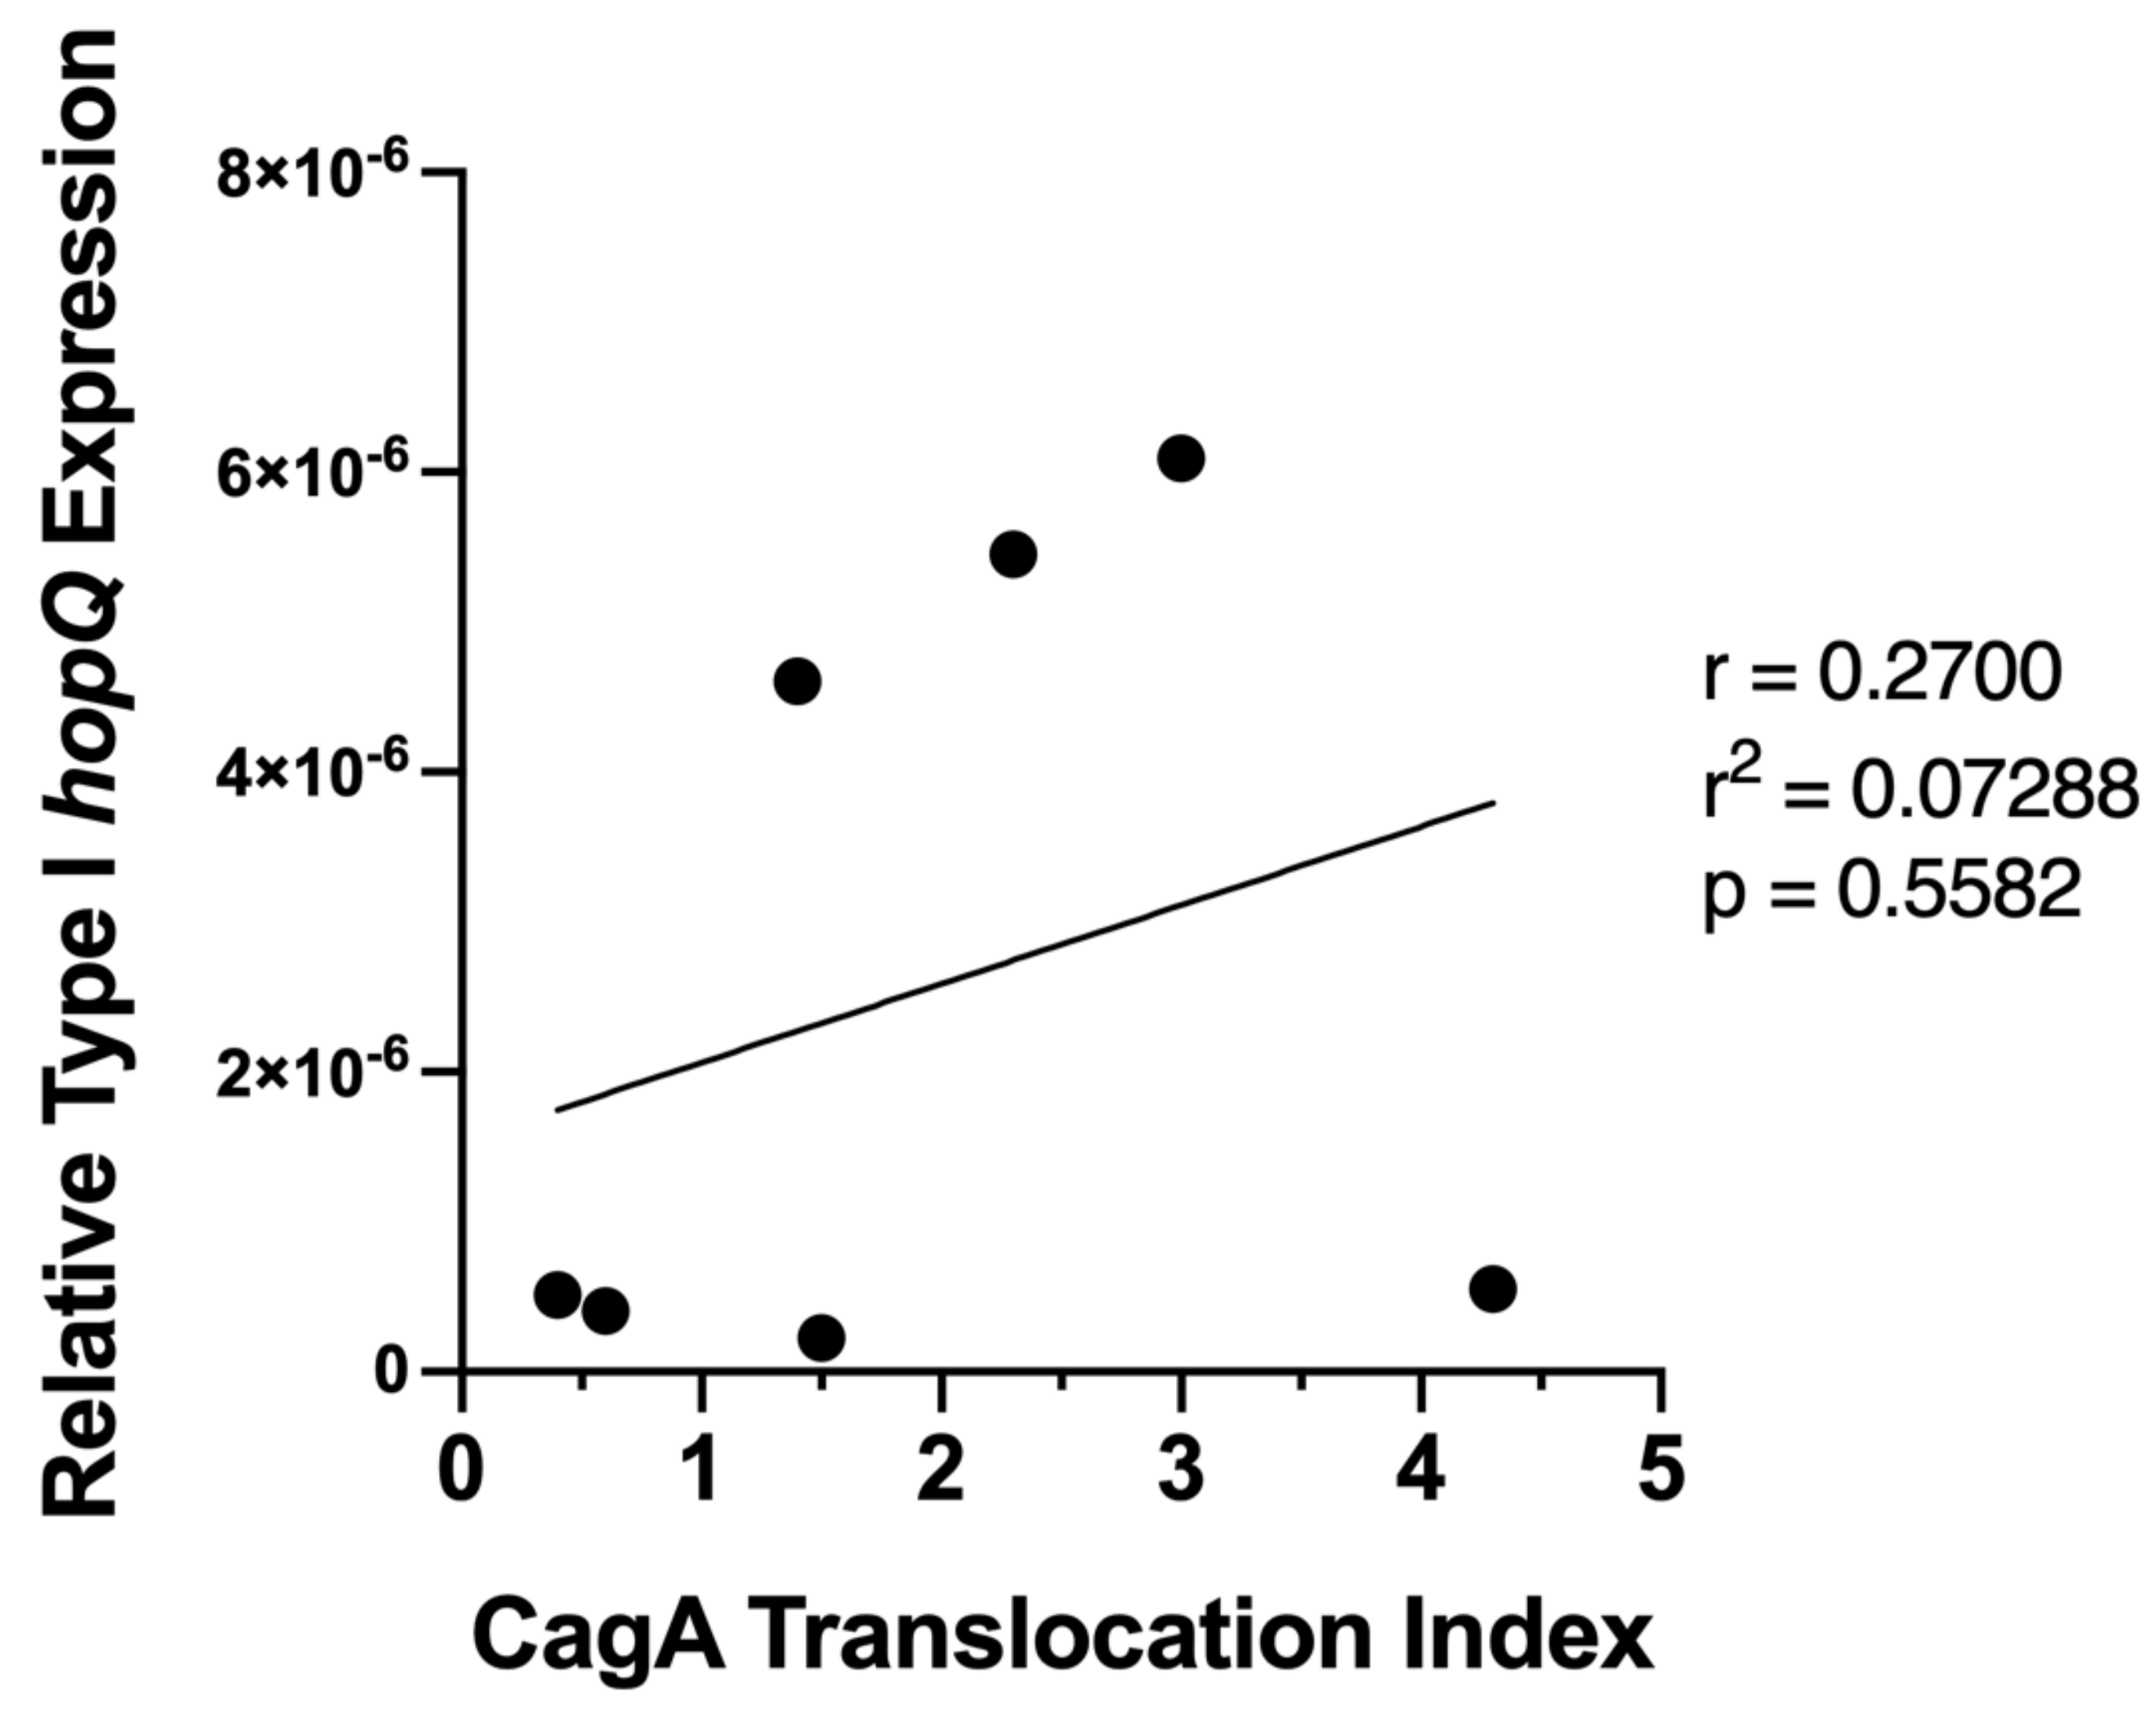

B

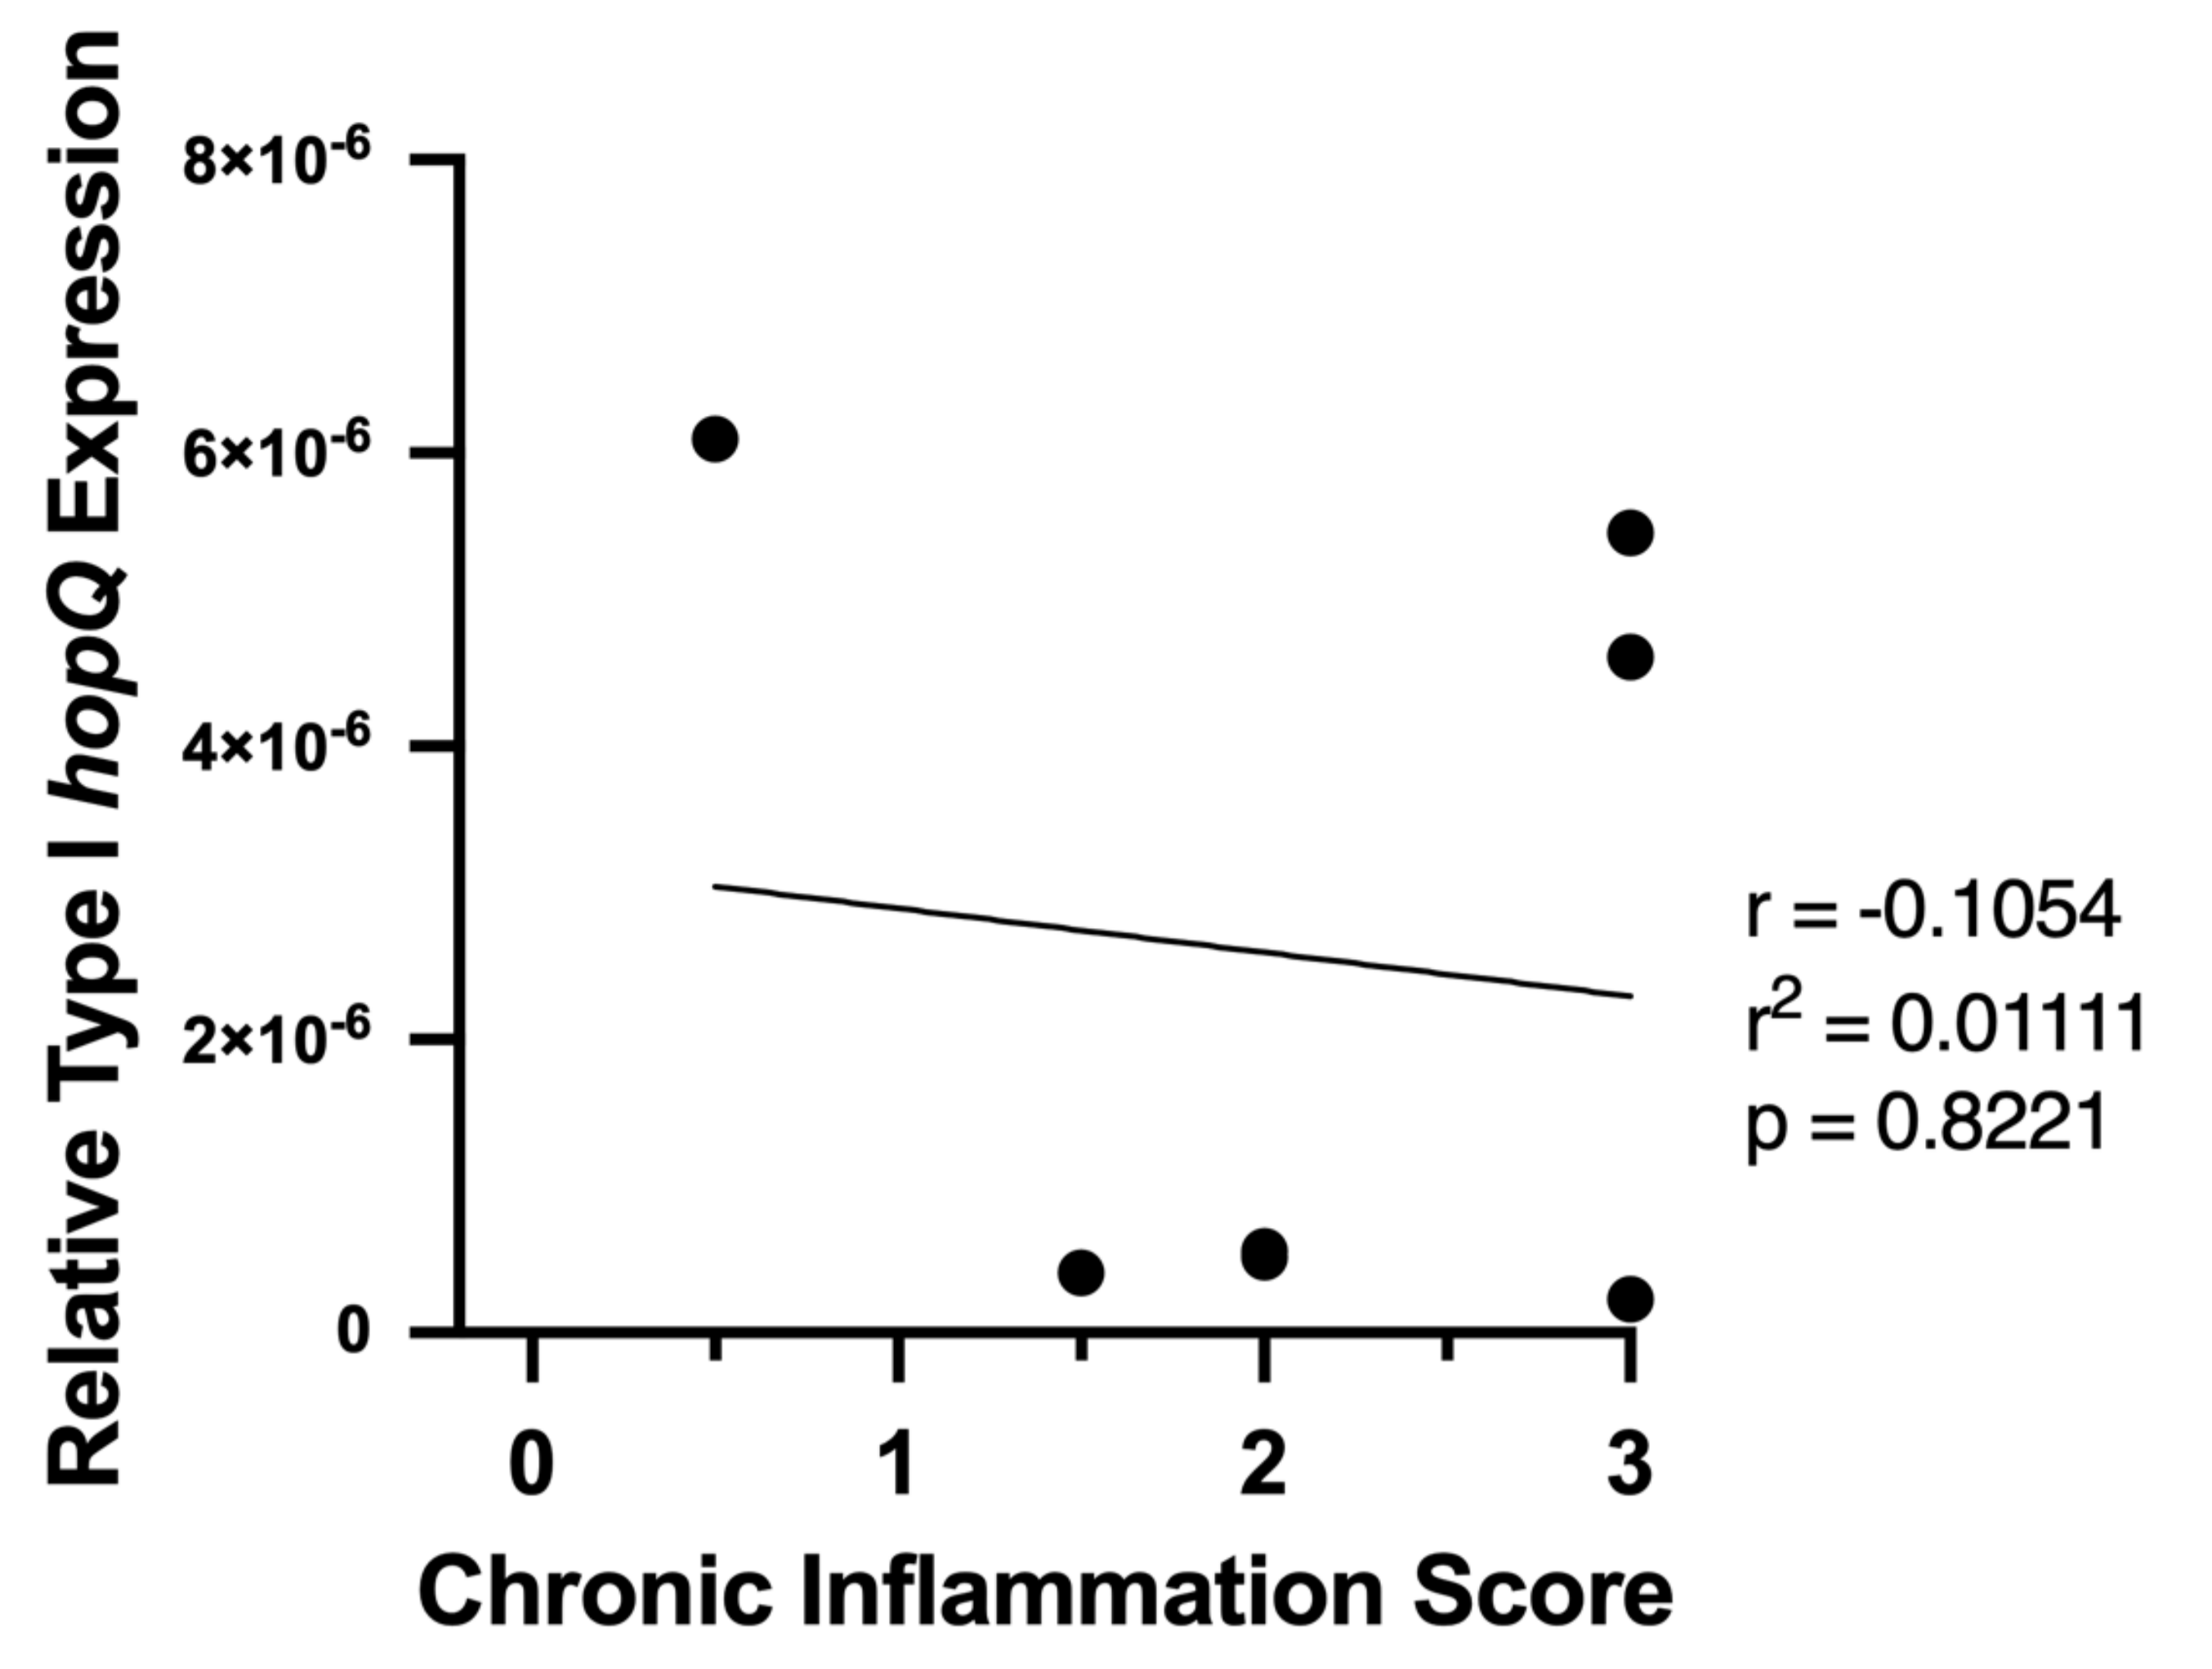

C

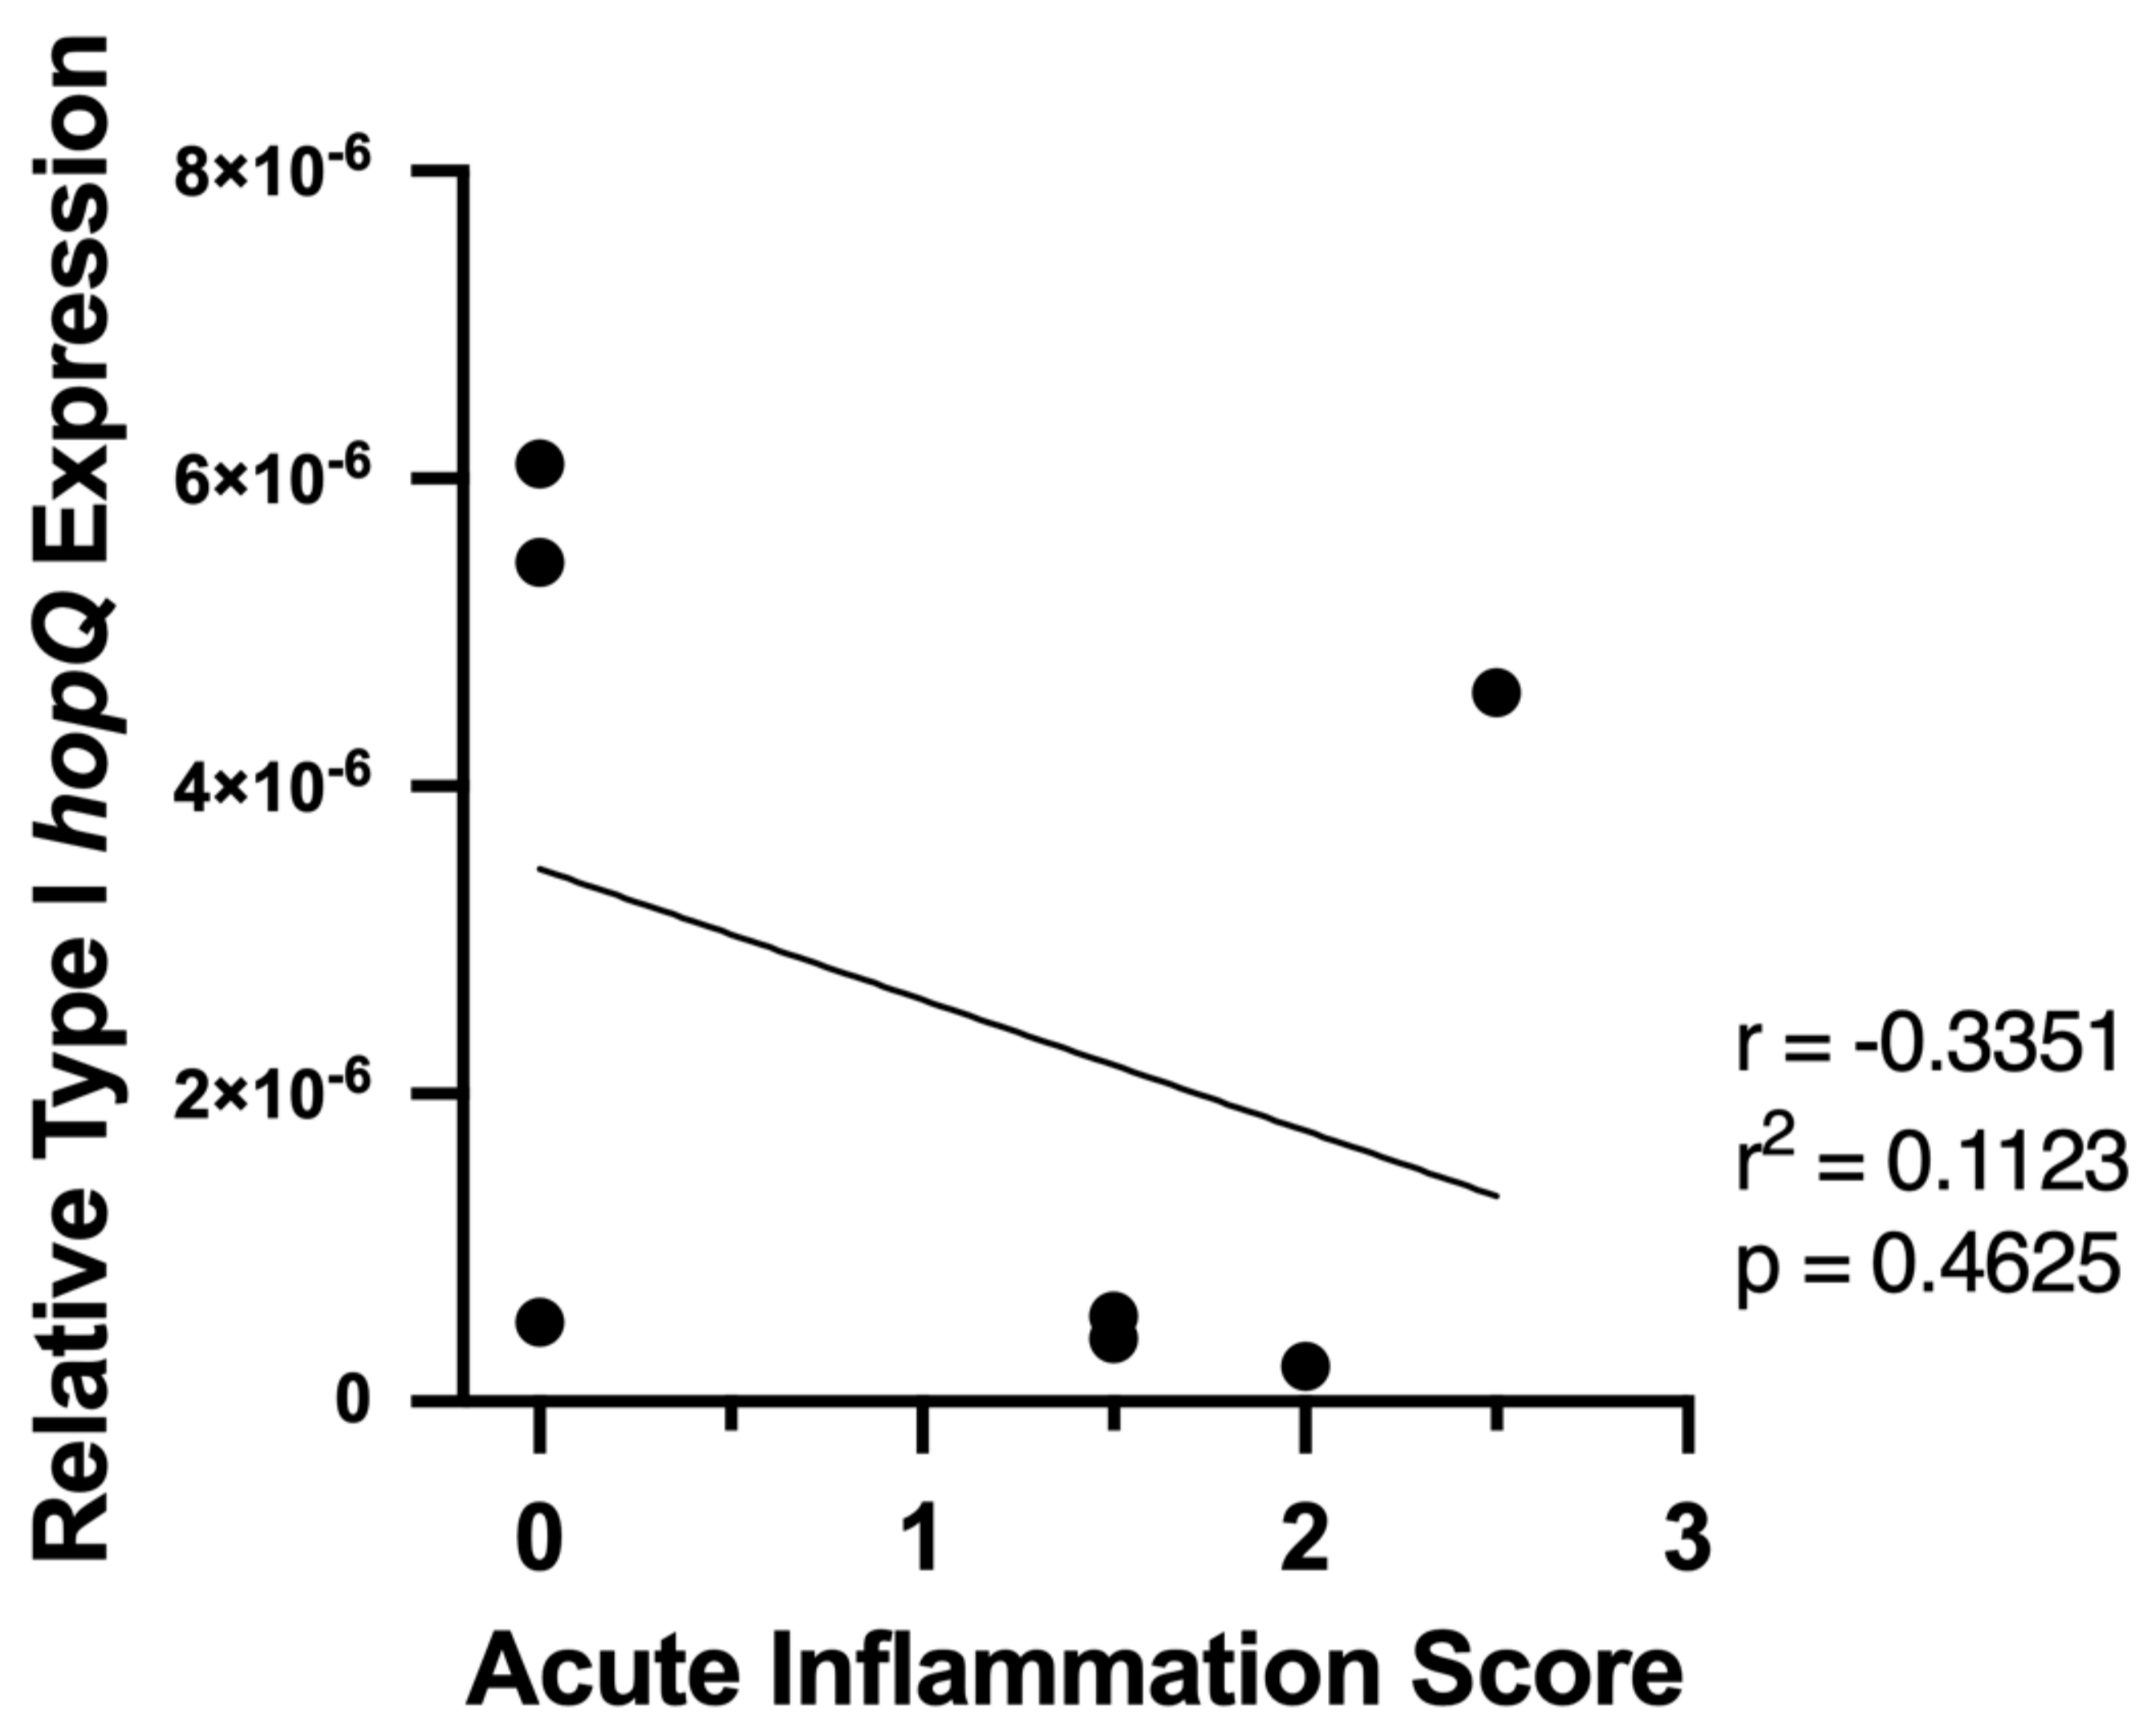

D

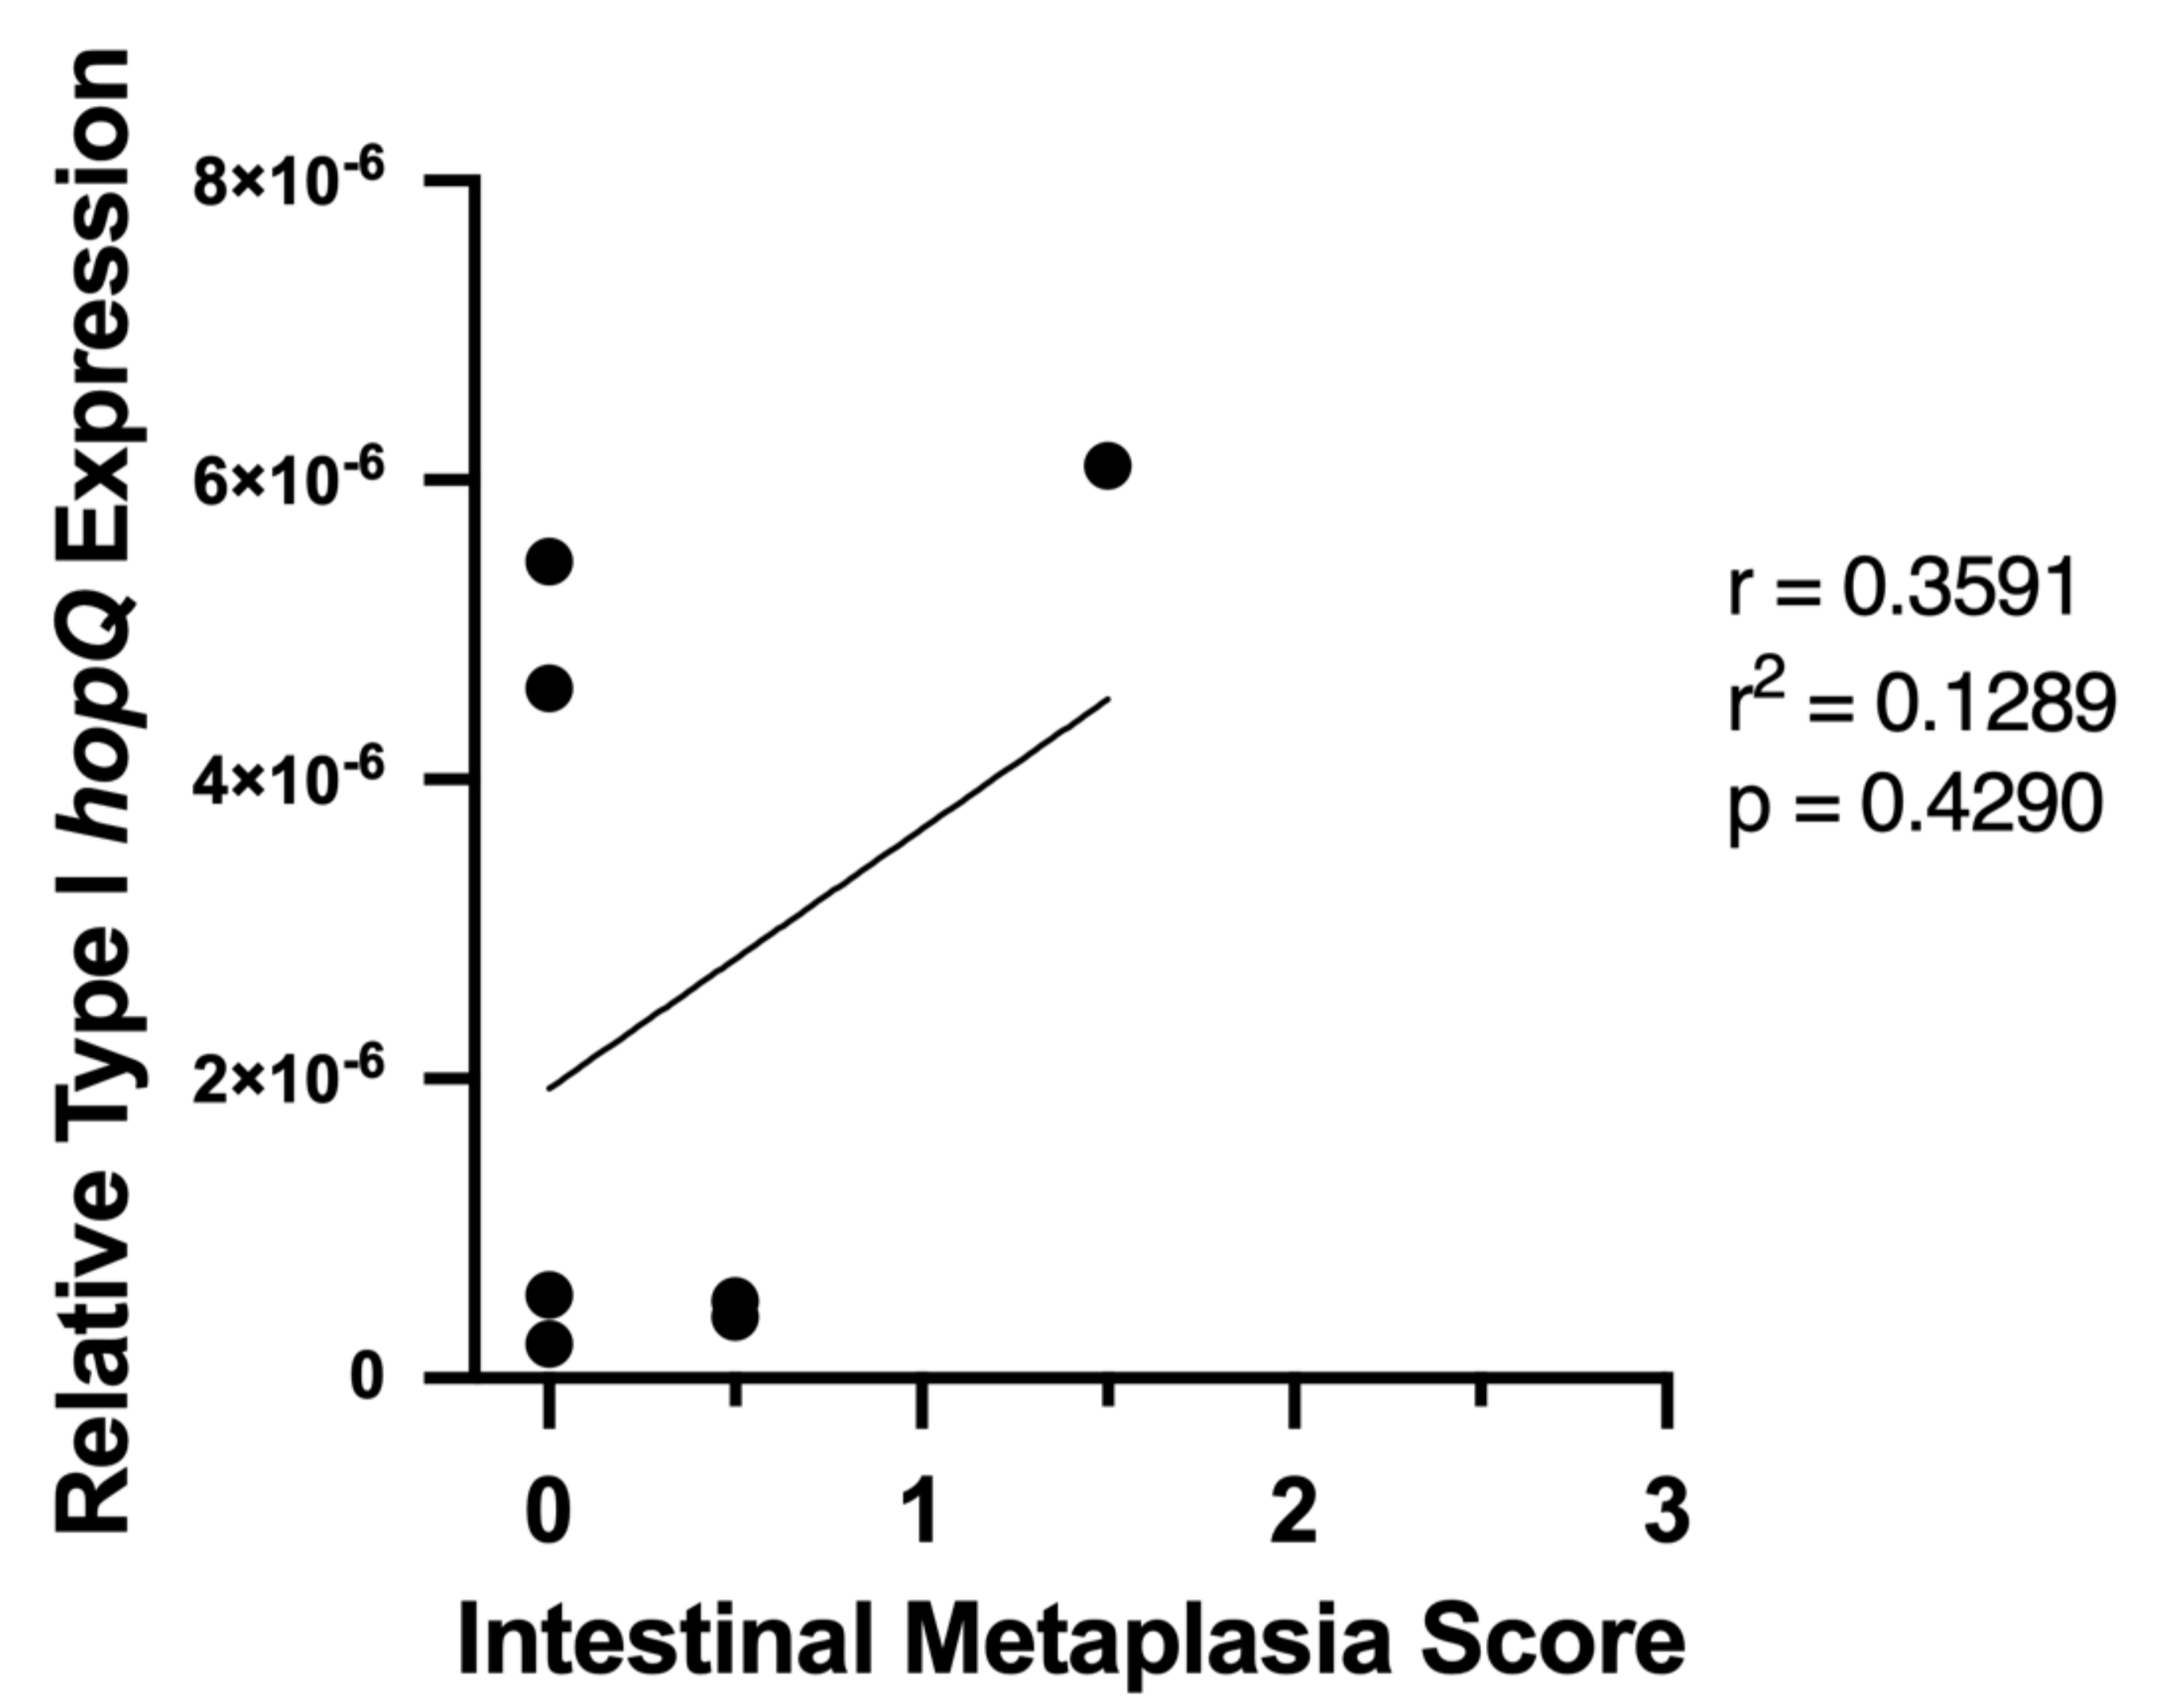

Supplement: jiaa730_suppl_supplementary_figure_4.pdf [file jiaa730_suppl_supplementary_figure_4.pdf]

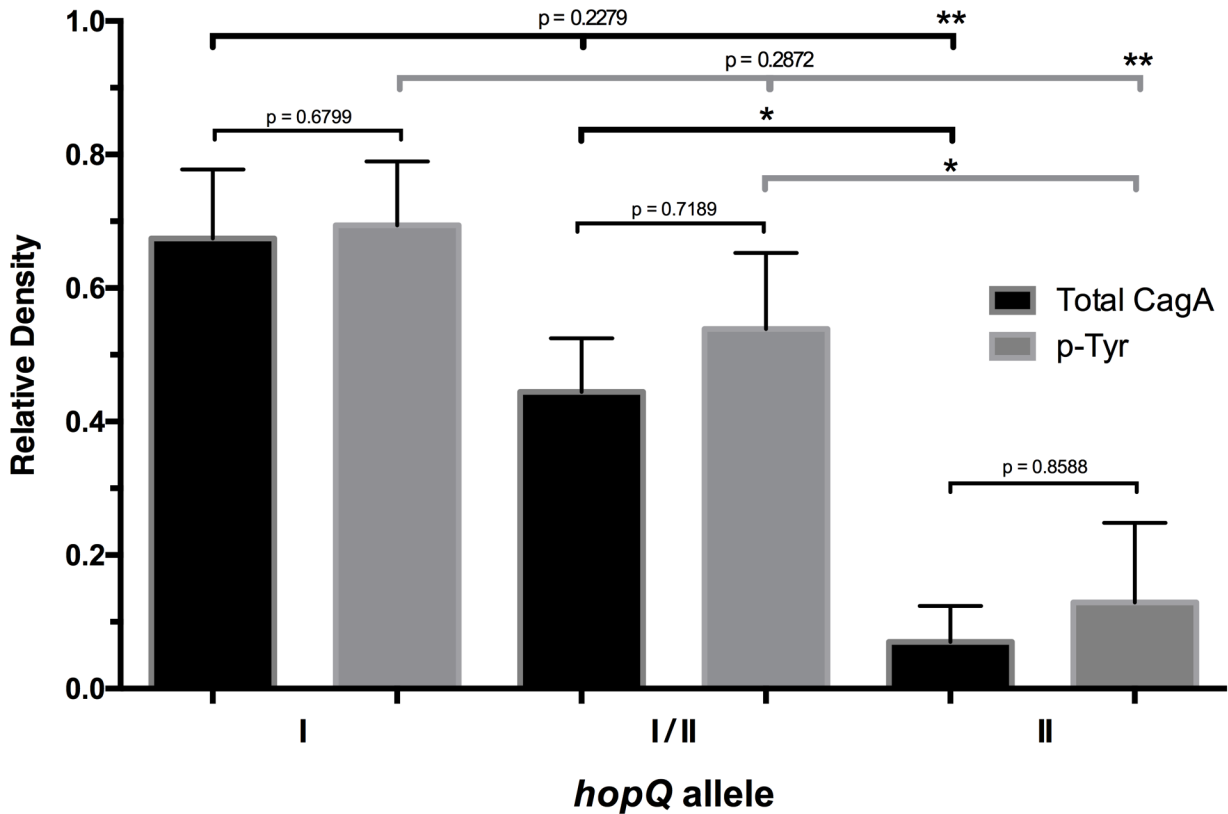

Supplement: jiaa730_suppl_supplementary_figure_5.pdf [file jiaa730_suppl_supplementary_figure_5.pdf]

A

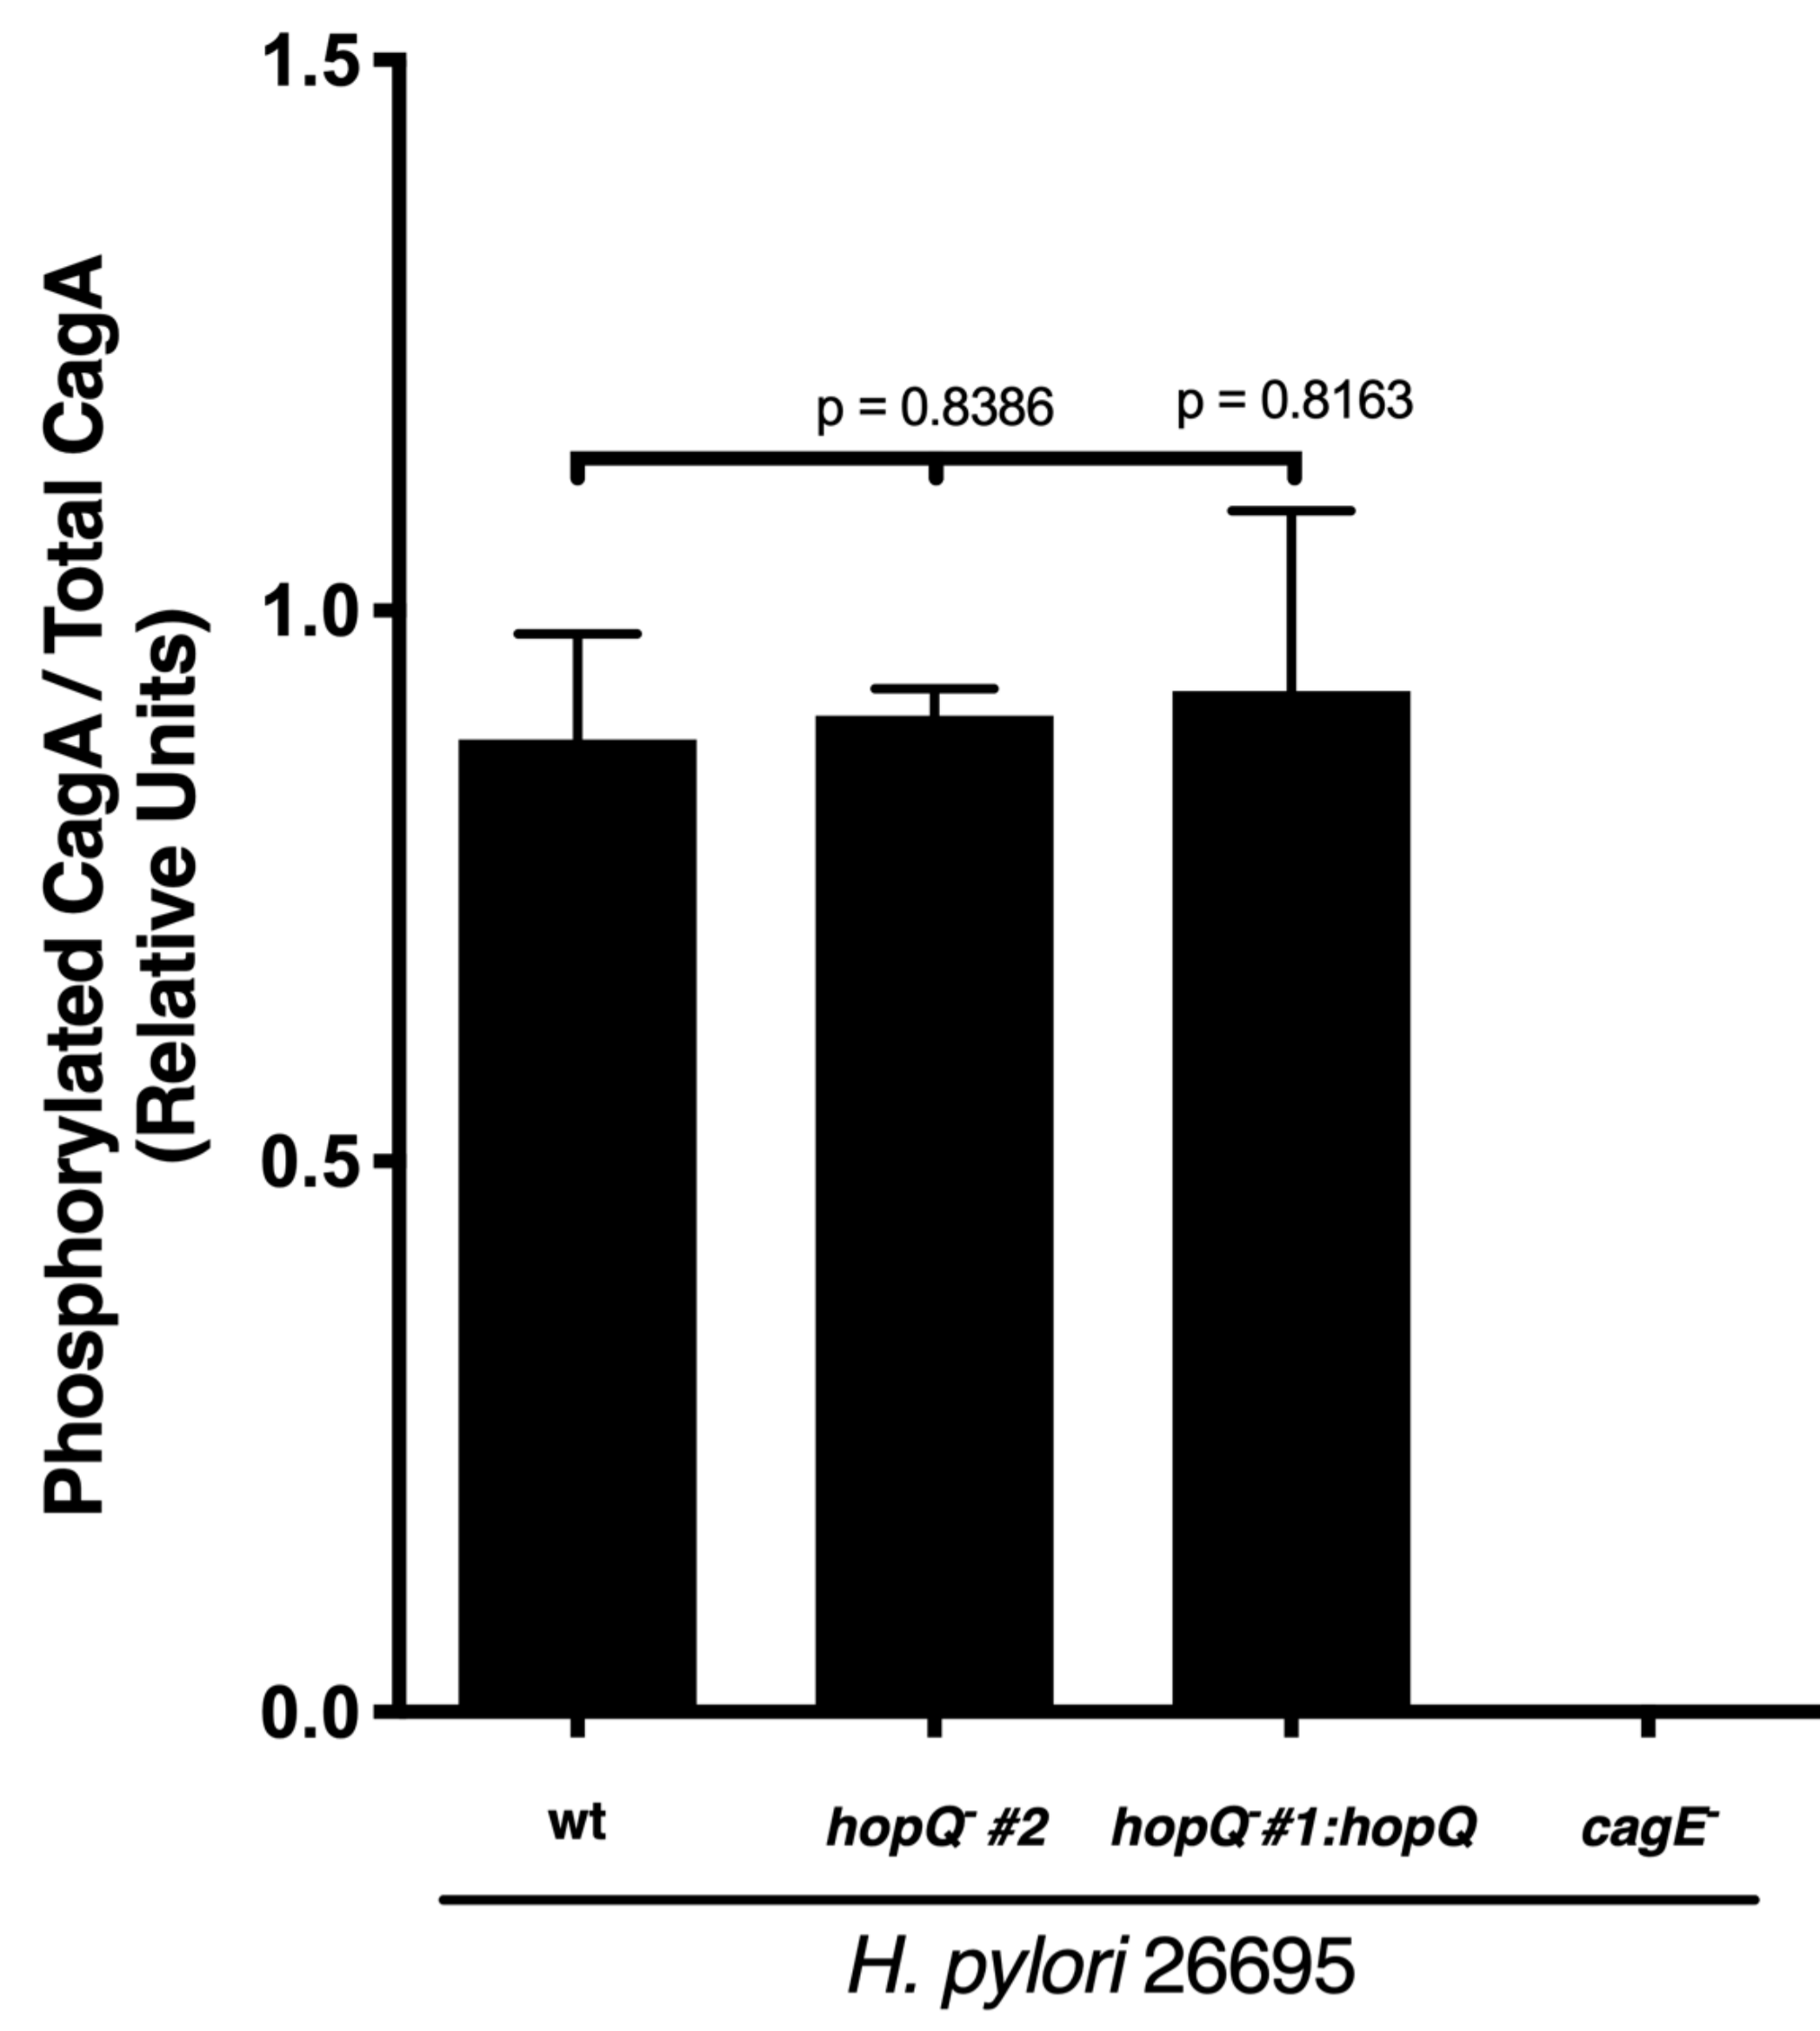

B

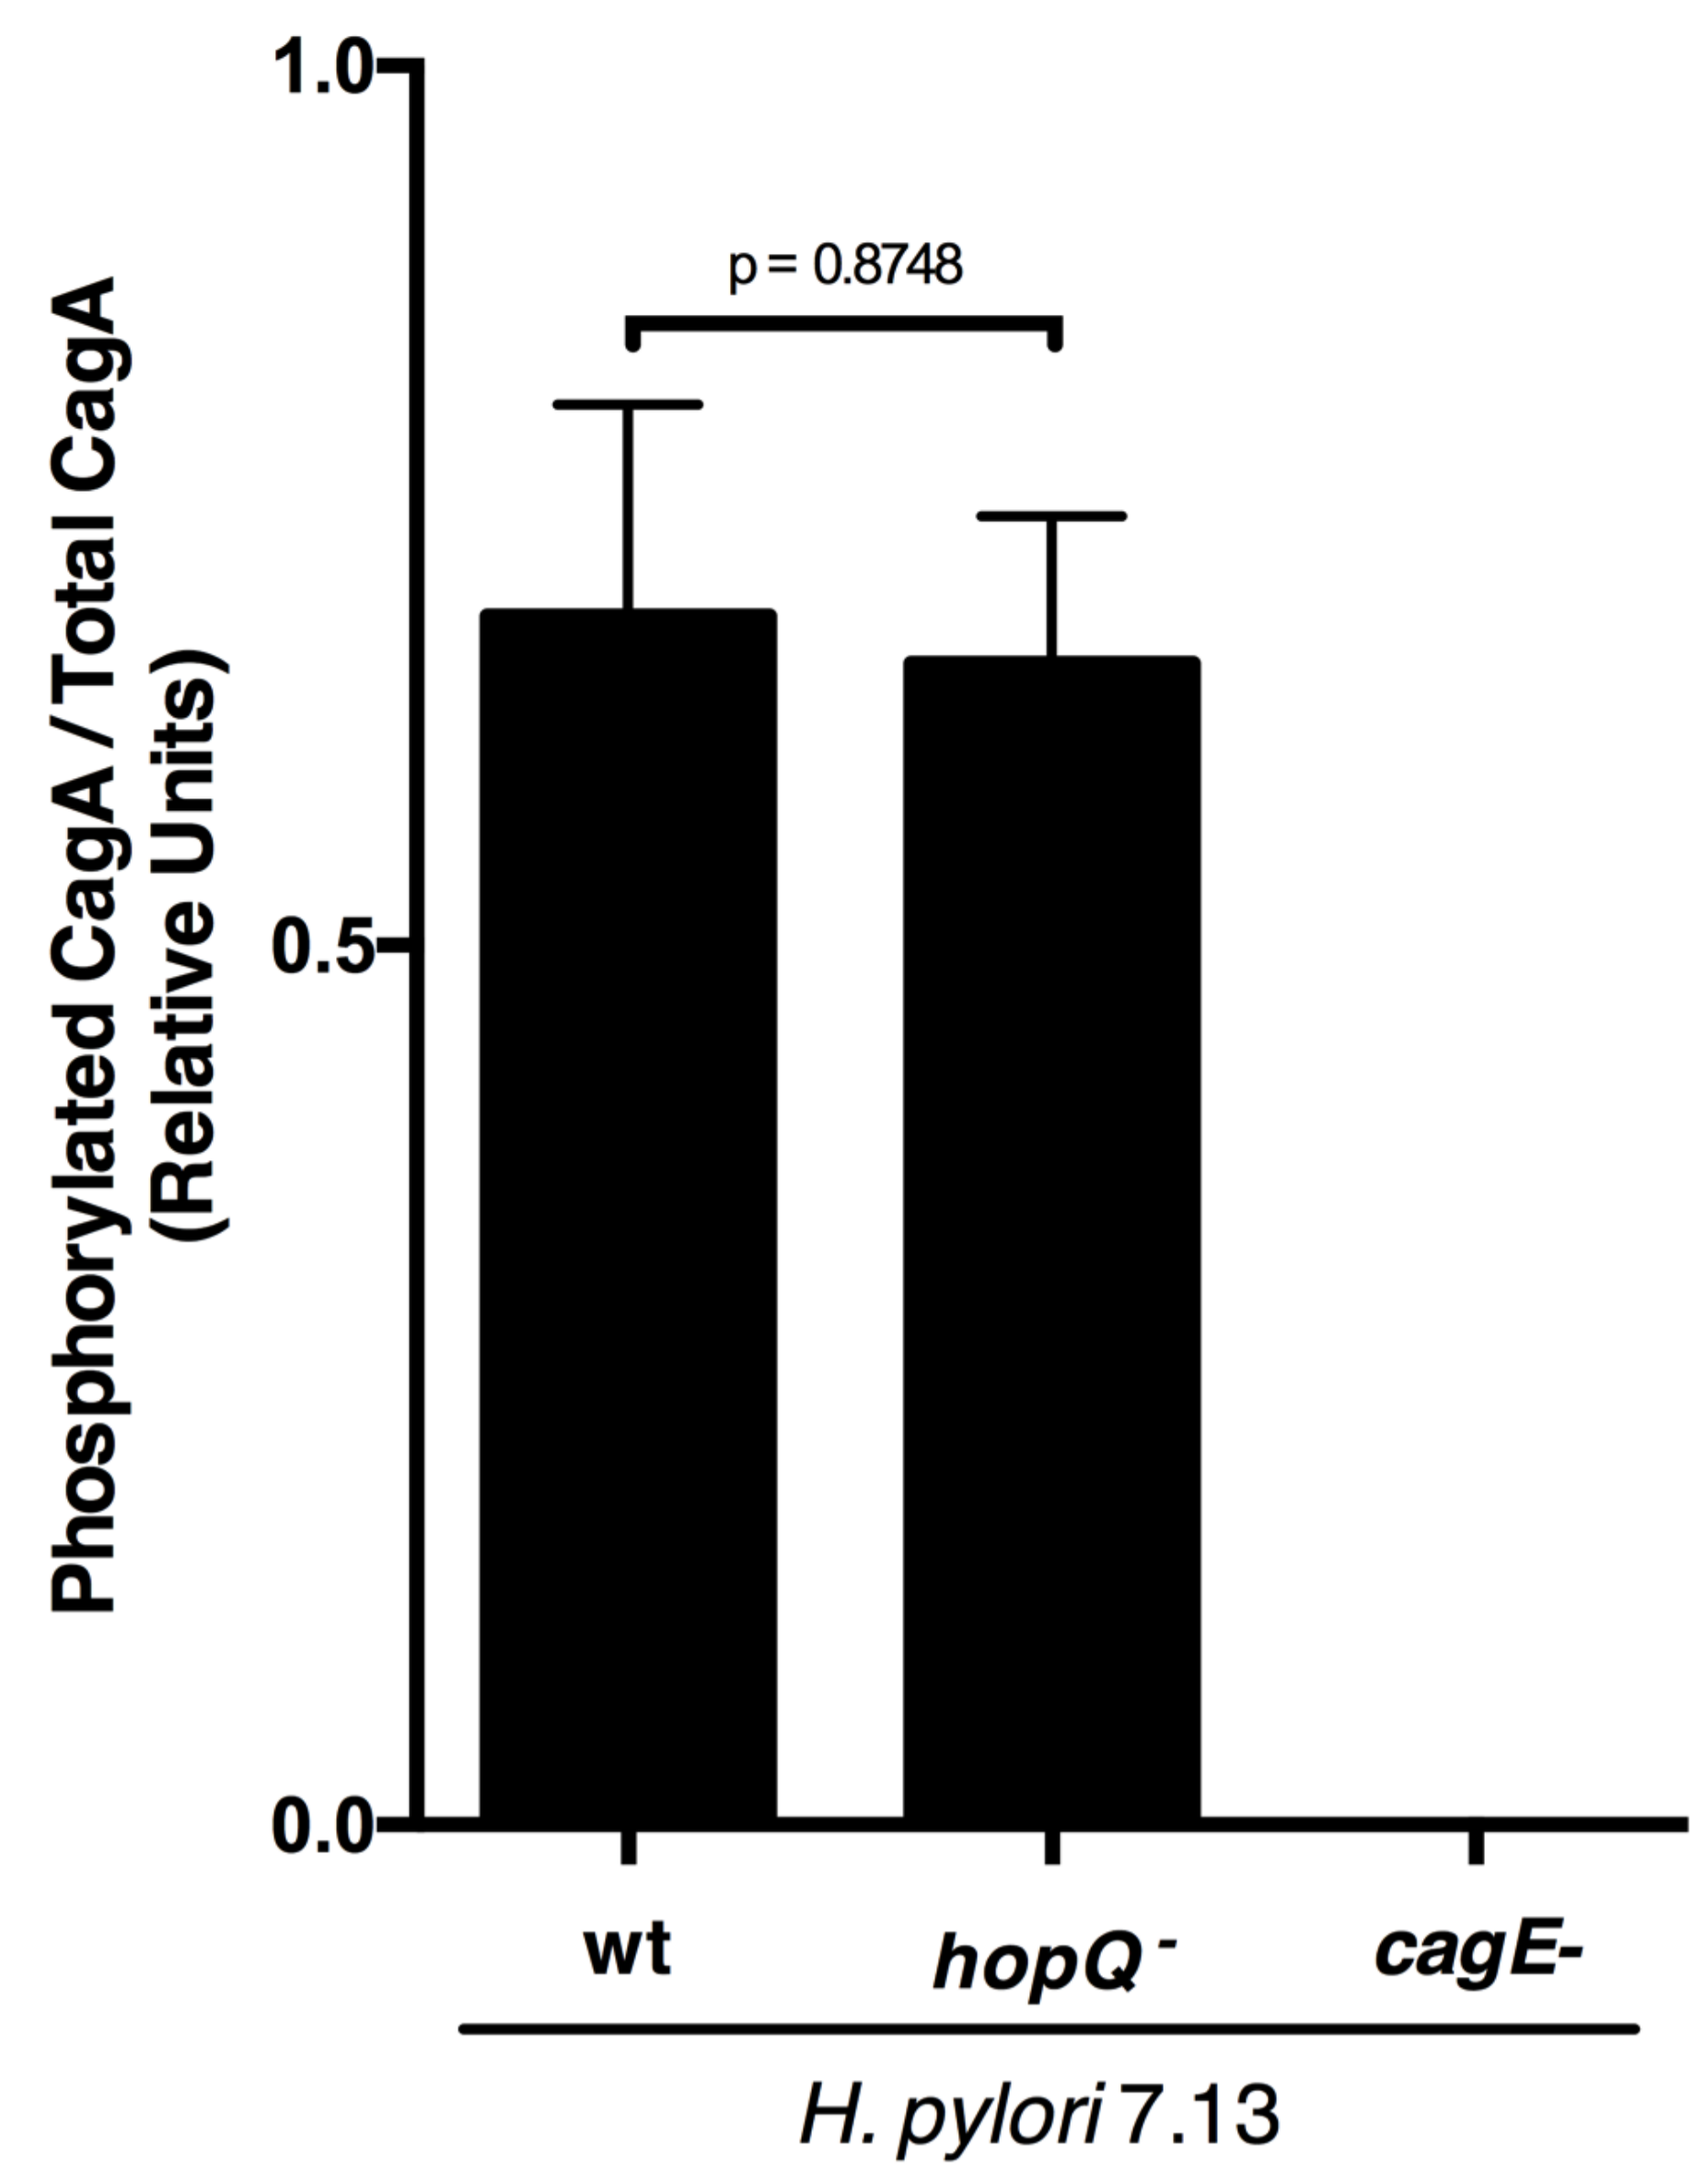

C

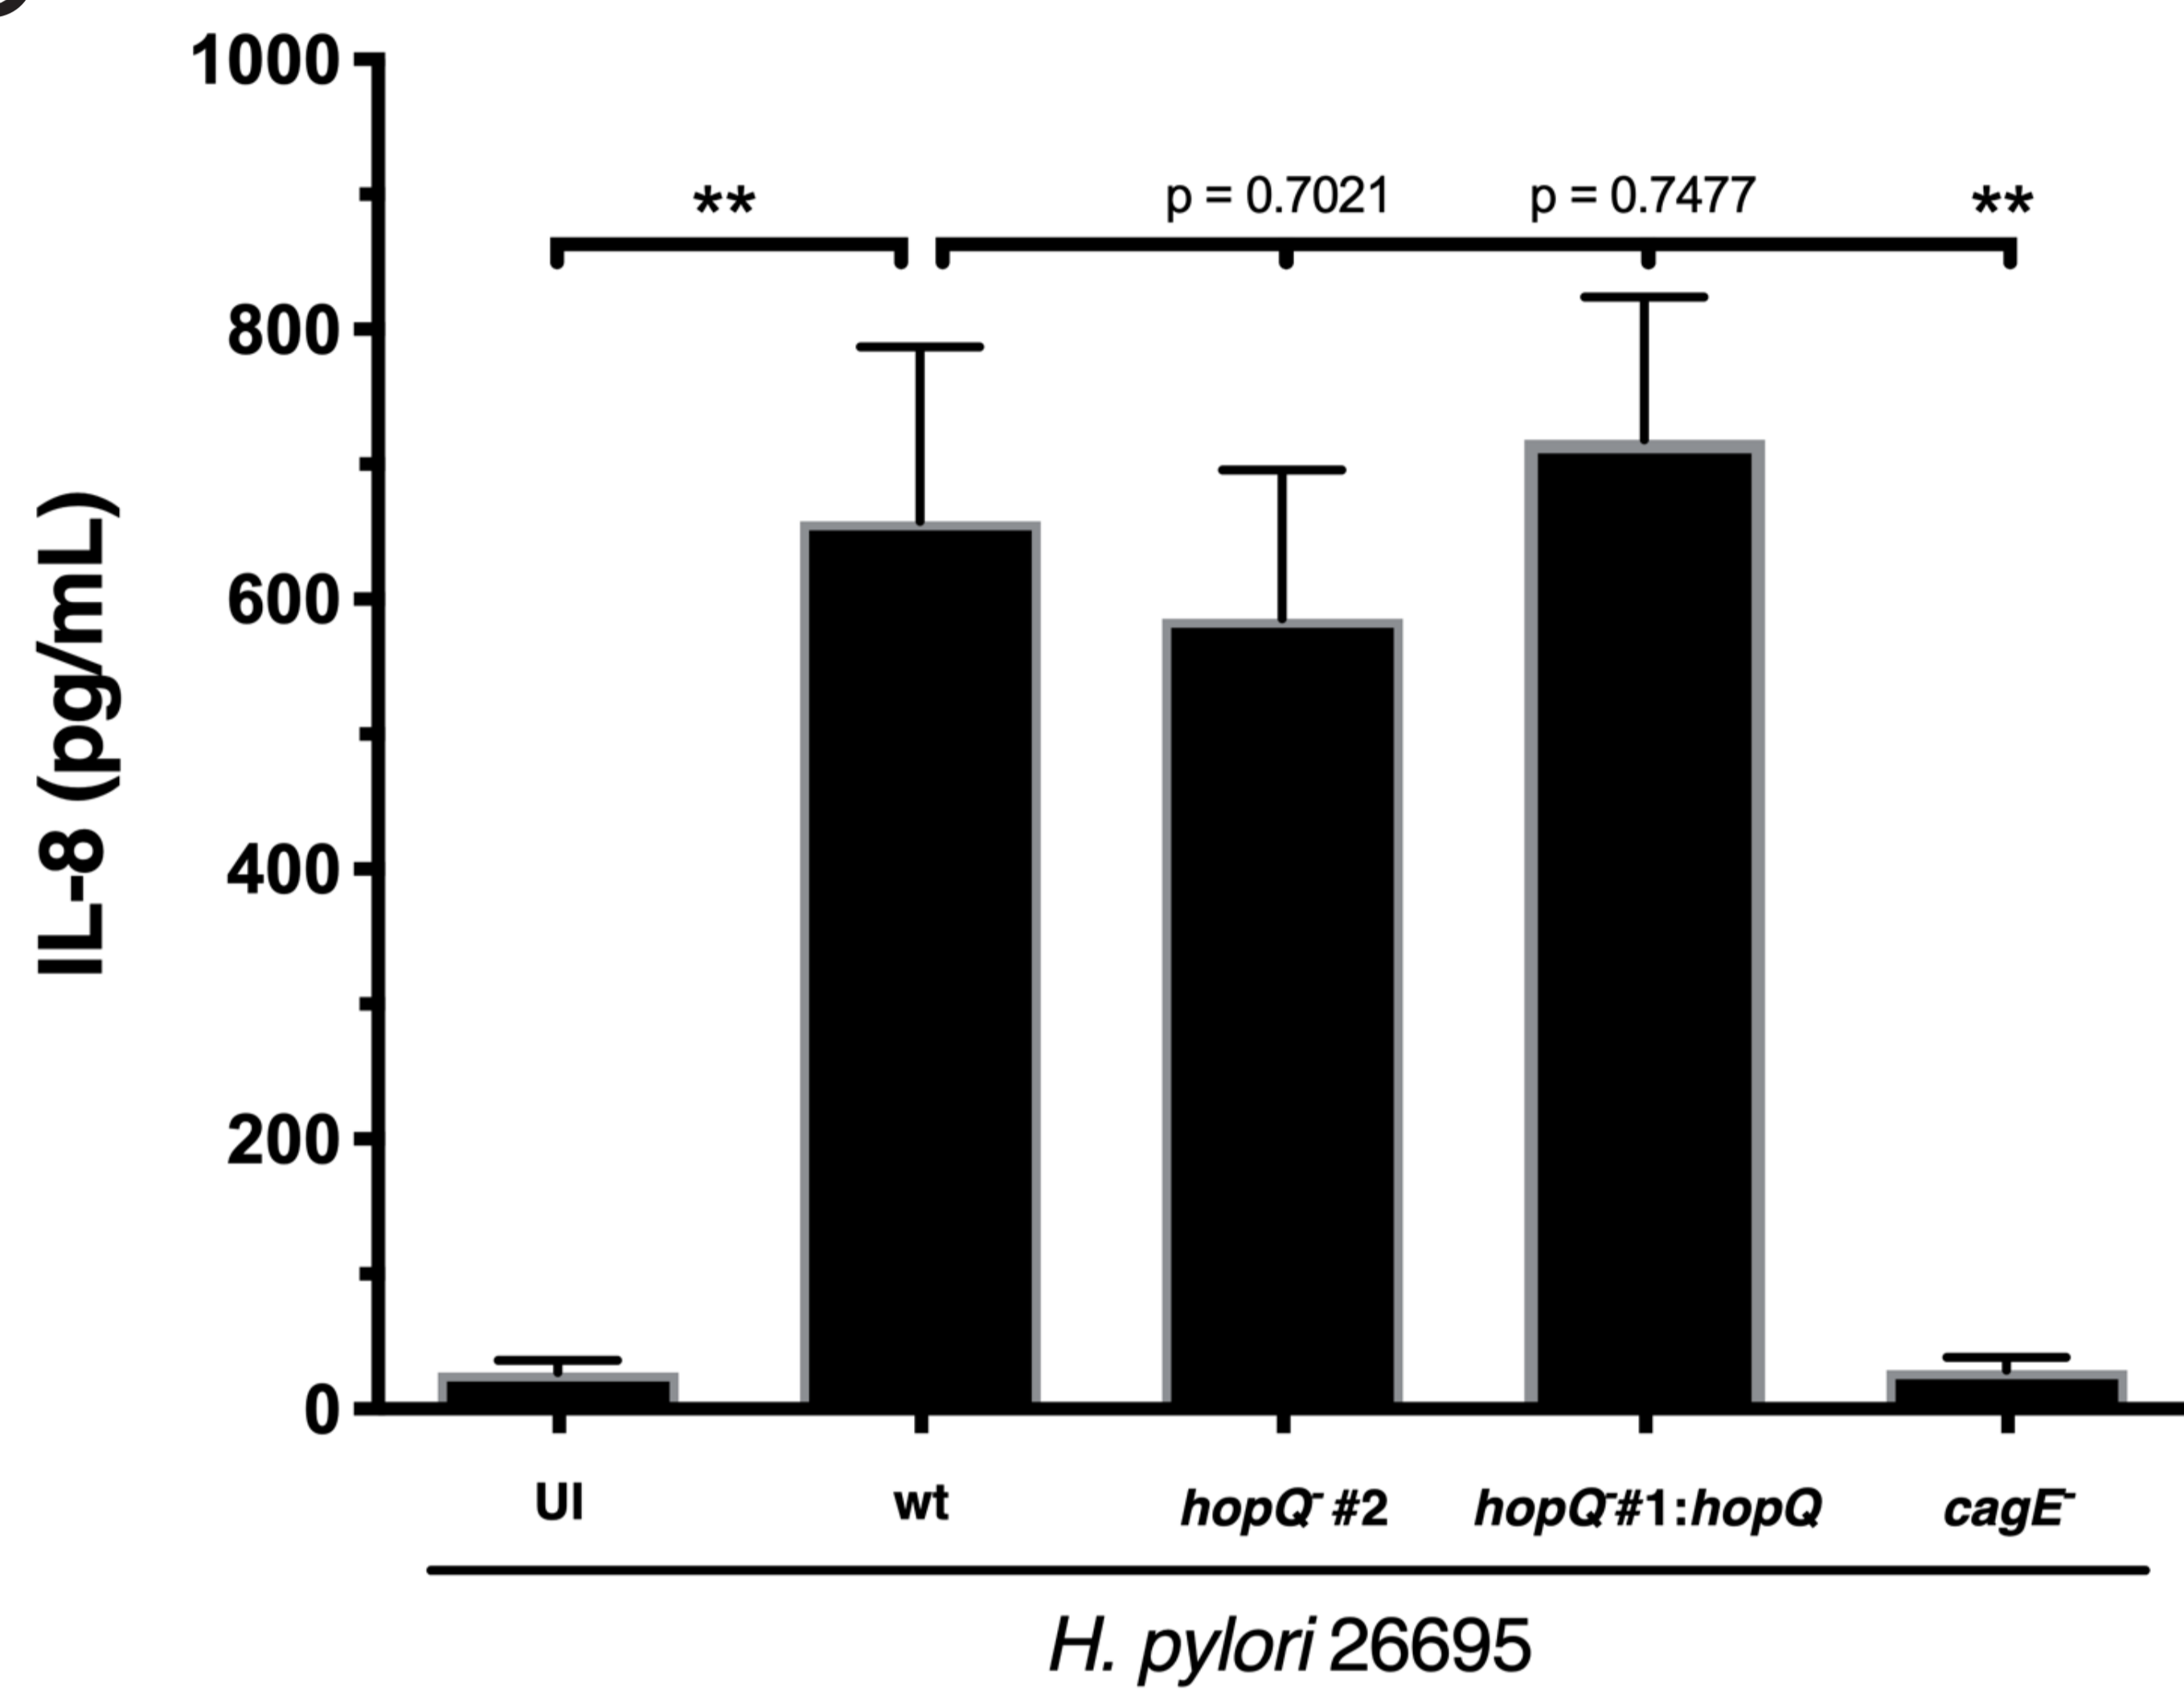

D

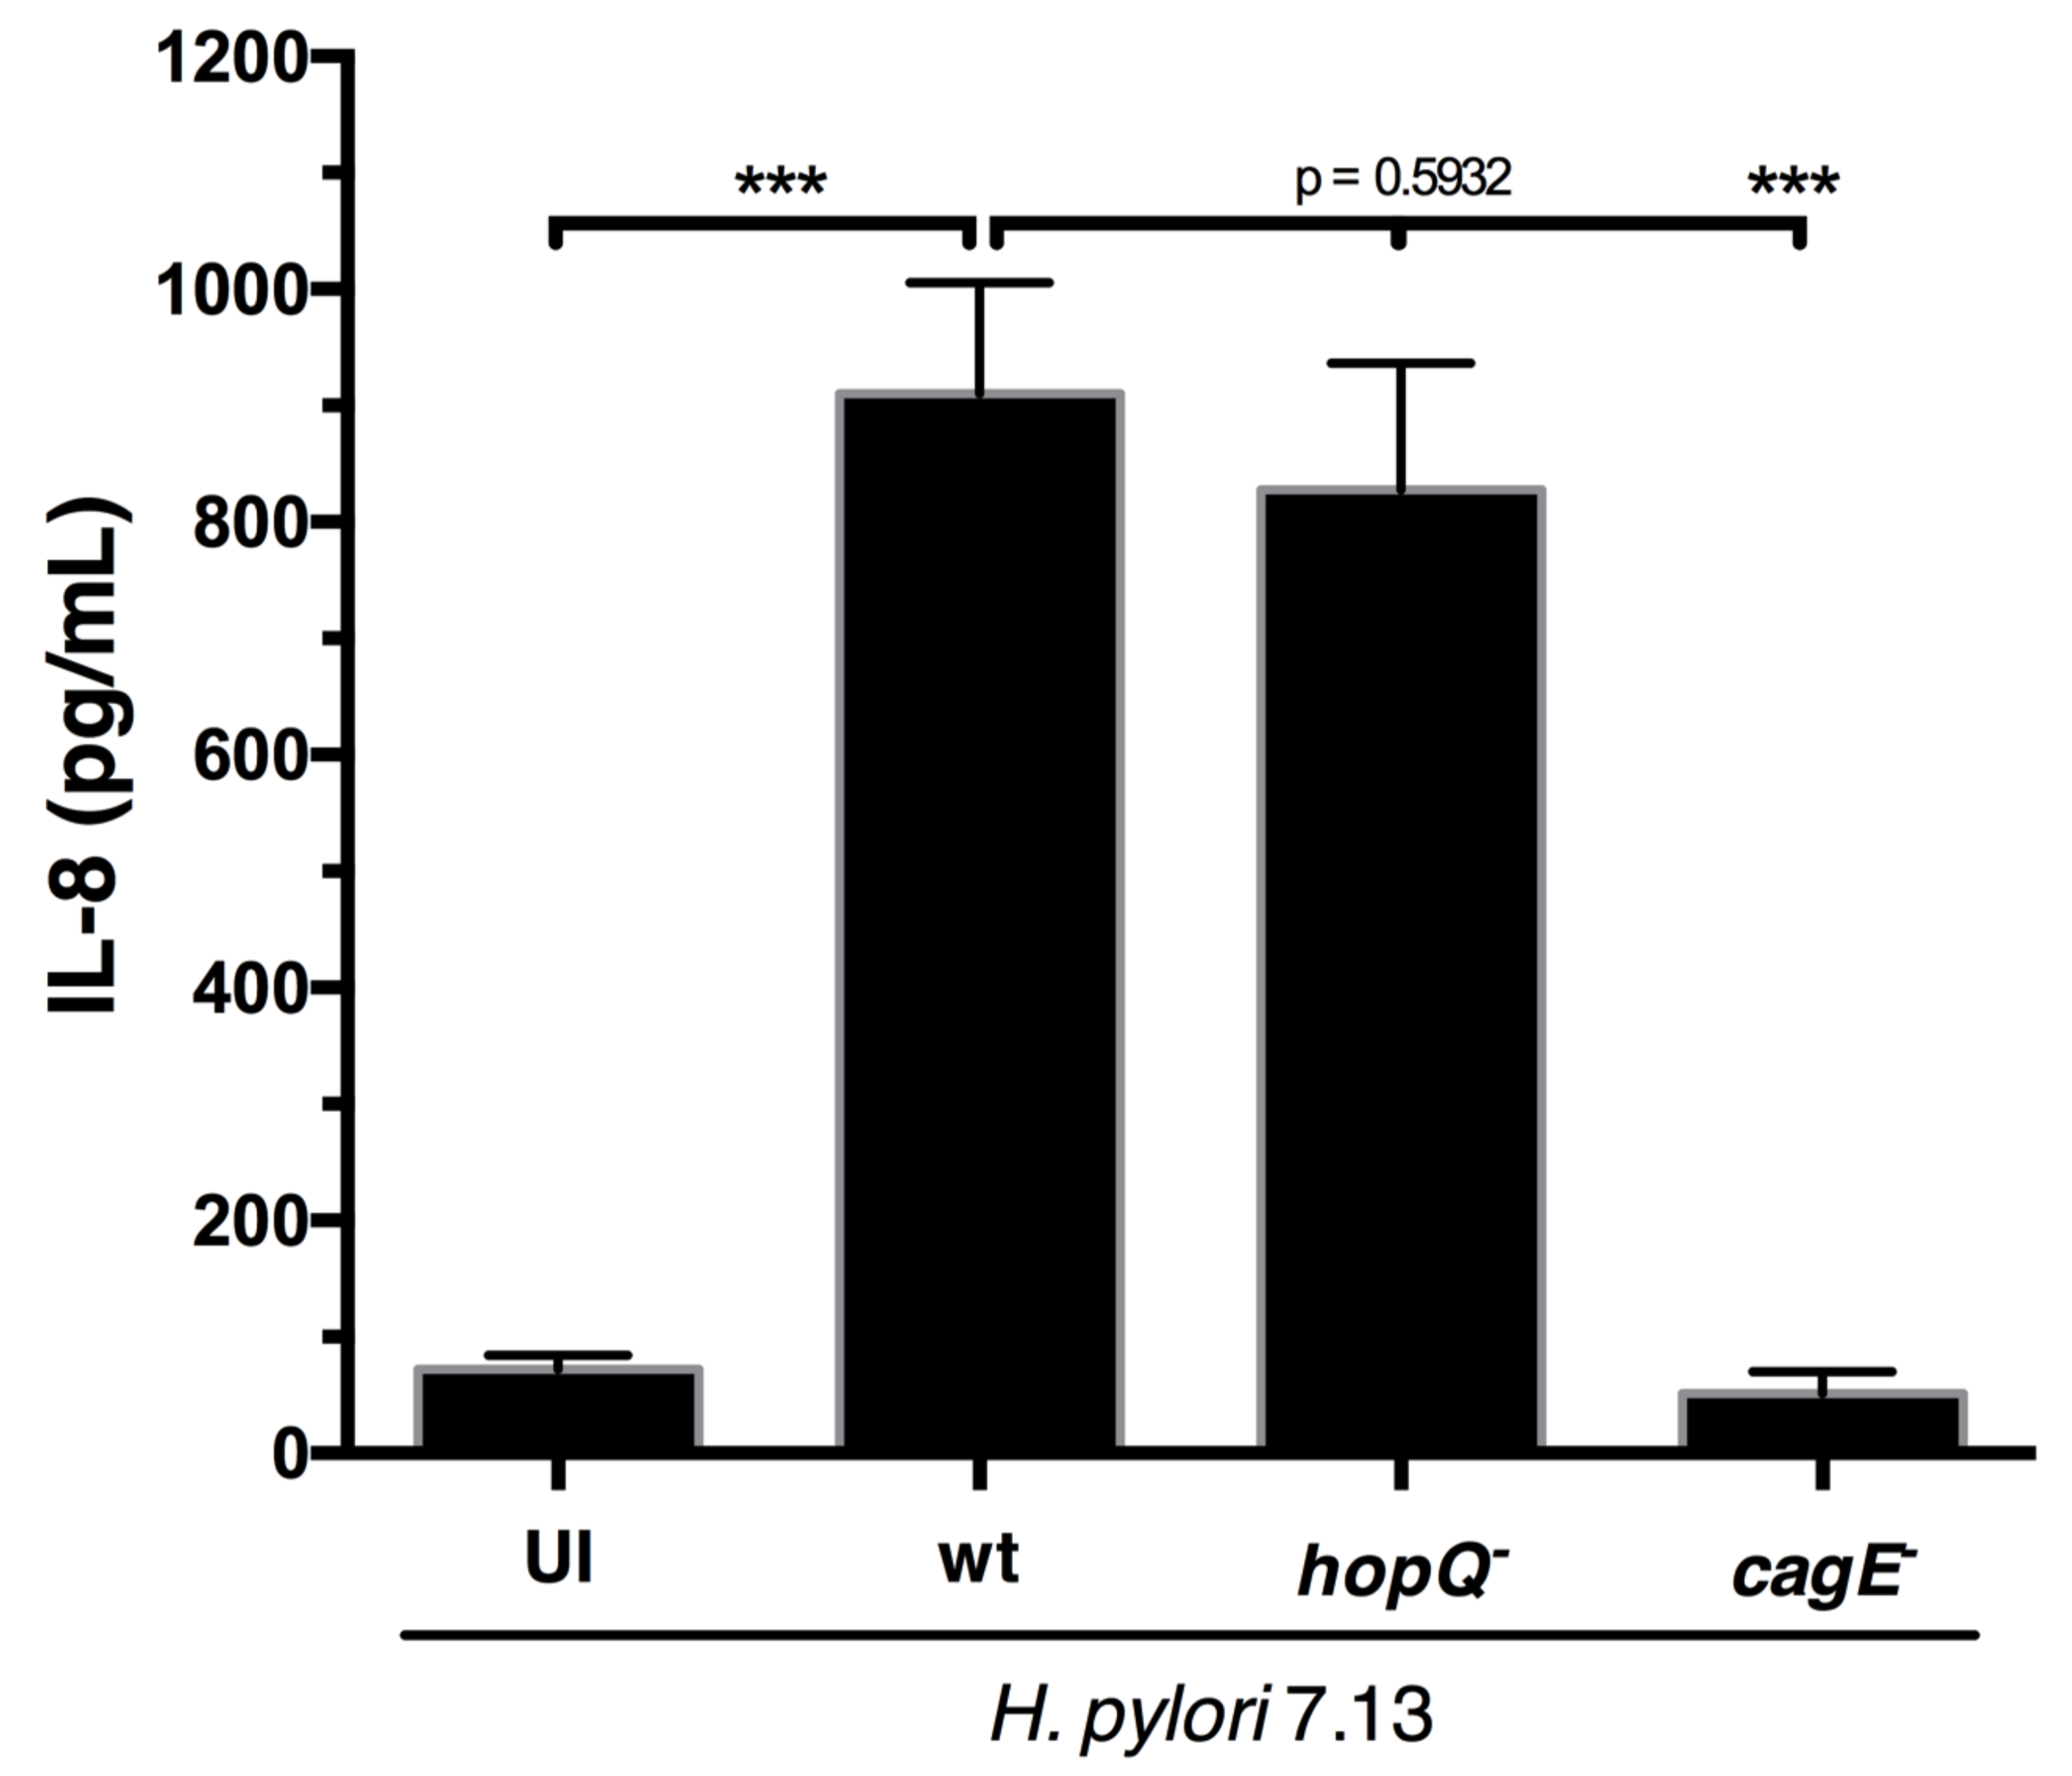

Supplement: jiaa730_suppl_supplementary_figure_6.pdf [file jiaa730_suppl_supplementary_figure_6.pdf]

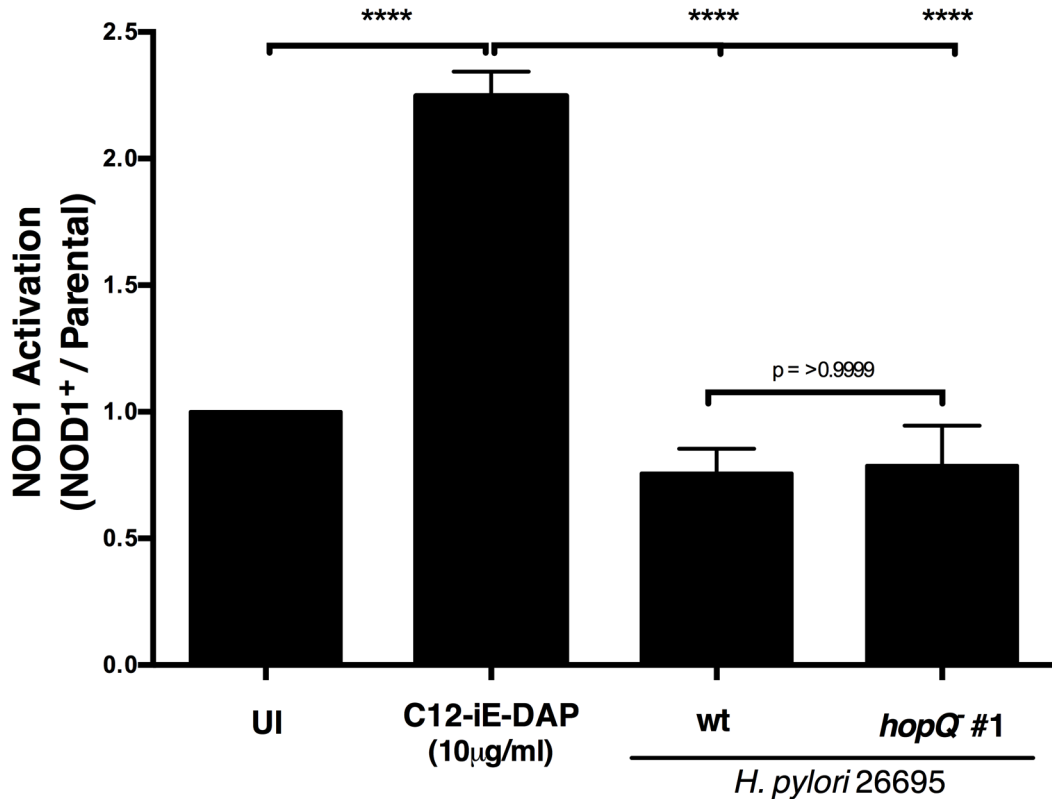

Supplement: jiaa730_suppl_supplementary_figure_7.pdf [file jiaa730_suppl_supplementary_figure_7.pdf]
